# Supplementary material for: Structure-guided discovery of food-derived GABA-T inhibitors as hunters for anti-anxiety compounds
Source: Royal Society of Chemistry journal article supplement (doi:10.1039/d2fo01315k), 2022-01-01
Supplement: d2fo01315k10.xlsx [file d2fo01315k10.xlsx]

## Sheet: YES
name	InChIKey	Canonical SMILES	CID	CAS	literature	PMID	DOI
lisuride	BKRGVLQUQGGVSM-KBXCAEBGSA-N	CCN(CC)C(=O)NC1CN(C2CC3=CNC4=CC=CC(=C34)C2=C1)C	28864	18016-80-3	Anxiolytic effects of lisuride and its agonistic action to central 5-HT1A receptors	1678728	10.1254/fpj.97.4_209
ipsapirone	TZJUVVIWVWFLCD-UHFFFAOYSA-N	C1CN(CCN1CCCCN2C(=O)C3=CC=CC=C3S2(=O)=O)C4=NC=CC=N4	56971	95847-70-4	Anxiolytic effects of the 5-HT1A receptor agonist ipsapirone in the rat: neurobiological correlates	7691626	10.1016/0014-2999(93)90541-o
lorazepam	DIWRORZWFLOCLC-UHFFFAOYSA-N	C1=CC=C(C(=C1)C2=NC(C(=O)NC3=C2C=C(C=C3)Cl)O)Cl	3958	846-49-1	Buspirone and lorazepam in the treatment of generalized anxiety disorder in outpatients	9600581	10.1007/s002130050578
Buspirone	QWCRAEMEVRGPNT-UHFFFAOYSA-N	C1CCC2(C1)CC(=O)N(C(=O)C2)CCCCN3CCN(CC3)C4=NC=CC=N4	2477	36505-84-7
uridine	DRTQHJPVMGBUCF-XVFCMESISA-N	C1=CN(C(=O)NC1=O)C2C(C(C(O2)CO)O)O	6029	58-96-8	[A pharmacological analysis of the anxiolytic activity of uridine]	1677620
barbiturate	HNYOPLTXPVRDBG-UHFFFAOYSA-M	C1C(=O)NC(=O)N=C1[O-]	3262018		Uridine receptor: discovery and its involvement in sleep mechanism	11322706	10.1093/sleep/24.3.251
benzodiazepine	SVUOLADPCWQTTE-UHFFFAOYSA-N	C1=CC=C2C(=C1)C=CC=NN2	134664	12794-10-4
pentobarbital	WEXRUCMBJFQVBZ-UHFFFAOYSA-N	CCCC(C)C1(C(=O)NC(=O)NC1=O)CC	4737	76-74-4	Naloxone blocks the antianxiety but not the motor effects of benzodiazepines and pentobarbital: experimental studies and literature review	7480551	10.1007/BF02246192
diazepam	AAOVKJBEBIDNHE-UHFFFAOYSA-N	CN1C(=O)CN=C(C2=C1C=CC(=C2)Cl)C3=CC=CC=C3	3016	439-14-5	Lactate-induced anxiety after imipramine and diazepam treatment	9160549	10.1002/anxi.3070010204
imipramine	BCGWQEUPMDMJNV-UHFFFAOYSA-N	CN(C)CCCN1C2=CC=CC=C2CCC3=CC=CC=C31	3696	50-49-7
quipazine	XRXDAJYKGWNHTQ-UHFFFAOYSA-N	C1CN(CCN1)C2=NC3=CC=CC=C3C=C2	5011	4774-24-7	Selective agonists and antagonists for 5-hydroxytryptamine receptor subtypes, and interactions with yohimbine and FG 7142 using the elevated plus-maze test in the rat	2892916	10.1111/j.2042-7158.1987.tb03129.x
cinanserin	RSUVYMGADVXGOU-BUHFOSPRSA-N	CN(C)CCCSC1=CC=CC=C1NC(=O)C=CC2=CC=CC=C2	5475158	1166-34-3	Synergistic antidepressant- and anxiolytic-like effects of harmaline along with cinanserin in acute restraint stress-treated mice	33190164	10.1007/s00213-020-05679-6
Triazolam	JOFWLTCLBGQGBO-UHFFFAOYSA-N	CC1=NN=C2N1C3=C(C=C(C=C3)Cl)C(=NC2)C4=CC=CC=C4Cl	5556	28911-01-5	Oral triazolam pretreatment for intravenous sedation	7943920
Citalopram	WSEQXVZVJXJVFP-UHFFFAOYSA-N	CN(C)CCCC1(C2=C(CO1)C=C(C=C2)C#N)C3=CC=C(C=C3)F	2771	59729-33-8	Anxiety sensitivity and modulation of the serotonergic system in patients with PD	15125987	10.1016/S0887-6185(02)00295-5
agomelatine	YJYPHIXNFHFHND-UHFFFAOYSA-N	CC(=O)NCCC1=CC=CC2=C1C=C(C=C2)OC	82148	138112-76-2	Efficacy and safety of agomelatine (10 or 25 mg/day) in non-depressed out-patients with generalized anxiety disorder: A 12-week, double-blind, placebo-controlled study	28298261	10.1016/j.euroneuro.2017.02.007
Mirtazapine	RONZAEMNMFQXRA-UHFFFAOYSA-N	CN1CCN2C(C1)C3=CC=CC=C3CC4=C2N=CC=C4	4205	85650-52-8	Efficacy of mirtazapine in clinically relevant subgroups of depressed patients	9597345
NYX-2925	NFXPEHLDVKVVKA-RBZYPMLTSA-N	CC(C)C(=O)N1CCCC12CN(C2=O)C(C(C)O)C(=O)N	134820579		NYX-2925 Is a Novel NMDA Receptor-Specific Spirocyclic-β-Lactam That Modulates Synaptic Plasticity Processes Associated with Learning and Memory	29099938	10.1093/ijnp/pyx096
dexmedetomidine	CUHVIMMYOGQXCV-NSHDSACASA-N	CC1=C(C(=CC=C1)C(C)C2=CN=CN2)C	5311068	113775-47-6	Double-blind Randomized Controlled Trial of Intranasal Dexmedetomidine Versus Intranasal Midazolam as Anxiolysis Prior to Pediatric Laceration Repair in the Emergency Department	27129606	10.1111/acem.12998
Zolpidem	ZAFYATHCZYHLPB-UHFFFAOYSA-N	CC1=CC=C(C=C1)C2=C(N3C=C(C=CC3=N2)C)CC(=O)N(C)C	5732	82626-48-0	Zolpidem extended-release improves sleep and next-day symptoms in comorbid insomnia and generalized anxiety disorder	19440075	10.1097/JCP.0b013e3181a390ba
brotizolam	UMSGKTJDUHERQW-UHFFFAOYSA-N	CC1=NN=C2N1C3=C(C=C(S3)Br)C(=NC2)C4=CC=CC=C4Cl	2451	57801-81-7	Pharmacology and hypnogenic properties of brotizolam in animals	6140946	10.1111/j.1365-2125.1983.tb02297.x
Progesterone	RJKFOVLPORLFTN-LEKSSAKUSA-N	CC(=O)C1CCC2C1(CCC3C2CCC4=CC(=O)CCC34C)C	5994	57-83-0	Estradiol promotes and progesterone reduces anxiety-like behavior produced by nicotine withdrawal in female rats	32540678	10.1016/j.psyneuen.2020.104694
Quinine	LOUPRKONTZGTKE-WZBLMQSHSA-N	COC1=CC2=C(C=CN=C2C=C1)C(C3CC4CCN3CC4C=C)O	3034034	72402-53-0	Anxiogenic activity of quinine--an experimental study in rodents	1506013
clonidine	GJSURZIOUXUGAL-UHFFFAOYSA-N	C1CN=C(N1)NC2=C(C=CC=C2Cl)Cl	2803	4205-90-7	Behavioral and physiologic effects of short-term and long-term administration of clonidine in panic disorder	2643934	10.1001/archpsyc.1989.01810020072012
melatonin	DRLFMBDRBRZALE-UHFFFAOYSA-N	CC(=O)NCCC1=CNC2=C1C=C(C=C2)OC	896	73-31-4	Melatonin for pre- and postoperative anxiety in adults	25856551	10.1002/14651858.CD009861.pub2
Pheniramine	IJHNSHDBIRRJRN-UHFFFAOYSA-N	CN(C)CCC(C1=CC=CC=C1)C2=CC=CC=N2	4761	86-21-5	Assessment of the effects of antihistamine drugs on mood, sleep quality, sleepiness, and dream anxiety	24673474	10.3109/13651501.2014.907919
rupatadine	WUZYKBABMWJHDL-UHFFFAOYSA-N	CC1=CC(=CN=C1)CN2CCC(=C3C4=C(CCC5=C3N=CC=C5)C=C(C=C4)Cl)CC2	133017	158876-82-5
Cetirizine	ZKLPARSLTMPFCP-UHFFFAOYSA-N	C1CN(CCN1CCOCC(=O)O)C(C2=CC=CC=C2)C3=CC=C(C=C3)Cl	2678	83881-51-0
hydroxyzine	ZQDWXGKKHFNSQK-UHFFFAOYSA-N	C1CN(CCN1CCOCCO)C(C2=CC=CC=C2)C3=CC=C(C=C3)Cl	3658	68-88-2
dehydroepiandrosterone sulfate	CZWCKYRVOZZJNM-USOAJAOKSA-N	CC12CCC3C(C1CCC2=O)CC=C4C3(CCC(C4)OS(=O)(=O)O)C	12594	651-48-9	[The dehydroepiandrosterone sulfate influence on anxiety and depressive behaviour: participation of mu-opioid receptors]	22165202
allopregnanolone	AURFZBICLPNKBZ-SYBPFIFISA-N	CC(=O)C1CCC2C1(CCC3C2CCC4C3(CCC(C4)O)C)C	92786	516-54-1	Possible GABAergic modulation in the protective effect of allopregnanolone on sleep deprivation-induced anxiety-like behavior and oxidative damage in mice	19229376	10.1358/mf.2008.30.9.1186076
midazolam	DDLIGBOFAVUZHB-UHFFFAOYSA-N	CC1=NC=C2N1C3=C(C=C(C=C3)Cl)C(=NC2)C4=CC=CC=C4F	4192	59467-70-8	[Pre-anesthetic medication with intranasal dexmedetomidine and oral midazolam as an anxiolytic. A clinical trial]	24472331	10.1016/j.anpedi.2013.12.006
Oxazepam	ADIMAYPTOBDMTL-UHFFFAOYSA-N	C1=CC=C(C=C1)C2=NC(C(=O)NC3=C2C=C(C=C3)Cl)O	4616	604-75-1	Passionflower in the treatment of generalized anxiety: a pilot double-blind randomized controlled trial with oxazepam	11679026	10.1046/j.1365-2710.2001.00367.x
Sodium valproate	AEQFSUDEHCCHBT-UHFFFAOYSA-M	CCCC(CCC)C(=O)[O-].[Na+]	16760703	1069-66-5	[Anxiolytic action of sodium valproate (possible role of gamma-aminobutyric acid in affective disorders)]	2860764
Promethazine	PWWVAXIEGOYWEE-UHFFFAOYSA-N	CC(CN1C2=CC=CC=C2SC3=CC=CC=C31)N(C)C	4927	60-87-7	Premedication with Midazolam (Dormicum) compared with Promethazine, Droperidol and placebo in relieving anxiety using Beck's anxiety inventory	7616557
zopiclone	GBBSUAFBMRNDJC-UHFFFAOYSA-N	CN1CCN(CC1)C(=O)OC2C3=NC=CN=C3C(=O)N2C4=NC=C(C=C4)Cl	5735	43200-80-2	Sedative and anxiolytic effects of zopiclone's enantiomers and metabolite	11274997	10.1016/s0014-2999(01)00851-2
carbamazepine	FFGPTBGBLSHEPO-UHFFFAOYSA-N	C1=CC=C2C(=C1)C=CC3=CC=CC=C3N2C(=O)N	2554	298-46-4	Neuro-protective effects of carbamazepine on sleep patterns and head and body shakes in kainic acid-treated rats	19414003	10.1016/j.cbi.2009.04.007
Droperidol	RMEDXOLNCUSCGS-UHFFFAOYSA-N	C1CN(CC=C1N2C3=CC=CC=C3NC2=O)CCCC(=O)C4=CC=C(C=C4)F	3168	548-73-2	Premedication with Midazolam (Dormicum) compared with Promethazine, Droperidol and placebo in relieving anxiety using Beck's anxiety inventory	7616557
aniracetam	ZXNRTKGTQJPIJK-UHFFFAOYSA-N	COC1=CC=C(C=C1)C(=O)N2CCCC2=O	2196	72432-10-1	Anxiolytic effects of aniracetam in three different mouse models of anxiety and the underlying mechanism	11412837	10.1016/s0014-2999(01)01005-6
ST4070	XJXAZBCFRJTJGS-UHFFFAOYSA-N	C=C(C1=CC=C(C=C1)C2=CC=CC=C2)OC(=O)N3CCCCC3	44201123		Potential Therapeutic Value of a Novel FAAH Inhibitor for the Treatment of Anxiety	26360704	10.1371/journal.pone.0137034
Entinostat	INVTYAOGFAGBOE-UHFFFAOYSA-N	C1=CC=C(C(=C1)N)NC(=O)C2=CC=C(C=C2)CNC(=O)OCC3=CN=CC=C3	4261	209783-80-2	Epigenetic Mechanisms Within the Cingulate Cortex Regulate Innate Anxiety-Like Behavior	30668714	10.1093/ijnp/pyz004
TSA	RTKIYFITIVXBLE-QEQCGCAPSA-N	CC(C=C(C)C=CC(=O)NO)C(=O)C1=CC=C(C=C1)N(C)C	444732	58880-19-6	Epigenetic modulation of chronic anxiety and pain by histone deacetylation	25288139	10.1038/mp.2014.122
vorinostat	WAEXFXRVDQXREF-UHFFFAOYSA-N	C1=CC=C(C=C1)NC(=O)CCCCCCC(=O)NO	5311	149647-78-9
sodium butyrate	MFBOGIVSZKQAPD-UHFFFAOYSA-M	CCCC(=O)[O-].[Na+]	5222465	156-54-7	Putative Epigenetic Involvement of the Endocannabinoid System in Anxiety- and Depression-Related Behaviors Caused by Nicotine as a Stressor	27404492	10.1371/journal.pone.0158950
Mocetinostat	HRNLUBSXIHFDHP-UHFFFAOYSA-N	C1=CC=C(C(=C1)N)NC(=O)C2=CC=C(C=C2)CNC3=NC=CC(=N3)C4=CN=CC=C4	9865515	726169-73-9	MGCD0103, a selective histone deacetylase inhibitor, coameliorates oligomeric Aβ 25-35 -induced anxiety and cognitive deficits in a mouse model	29978554	10.1111/cns.13029
harmaline	RERZNCLIYCABFS-UHFFFAOYSA-N	CC1=NCCC2=C1NC3=C2C=CC(=C3)OC	3564	304-21-2	Synergistic antidepressant- and anxiolytic-like effects of harmaline along with cinanserin in acute restraint stress-treated mice	33190164	10.1007/s00213-020-05679-6
arachidonylcyclopropylamide	GLGAUBPACOBAMV-DOFZRALJSA-N	CCCCCC=CCC=CCC=CCC=CCCCC(=O)NC1CC1	5311007	229021-64-1	Anxiolytic and antidepressant effects of ACPA and harmaline co-treatment	30797851	10.1016/j.bbr.2019.02.034
estazolam	CDCHDCWJMGXXRH-UHFFFAOYSA-N	C1C2=NN=CN2C3=C(C=C(C=C3)Cl)C(=N1)C4=CC=CC=C4	3261	29975-16-4	[Effect of modified xiaoyao powder for improving sleep in patients with psychological stress insomnia]	19548434
2'-Methoxy-6-methylflavone	QEIHFNZSIRWEBX-UHFFFAOYSA-N	CC1=CC2=C(C=C1)OC(=CC2=O)C3=CC=CC=C3OC	930492	89112-85-6	2 '-Methoxy-6-methylflavone: a novel anxiolytic and sedative with subtype selective activating and modulating actions at GABAA receptors	21797842	10.1111/j.1476-5381.2011.01604.x
chlordiazepoxide	BUCORZSTKDOEKQ-UHFFFAOYSA-N	CN=C1CN(C(=C2C=C(C=CC2=N1)Cl)C3=CC=CC=C3)O	2712	58-25-3	The staircase test in mice: a simple and efficient procedure for primary screening of anxiolytic agents	6149594	10.1007/BF00432023
phenobarbital	DDBREPKUVSBGFI-UHFFFAOYSA-N	CCC1(C(=O)NC(=O)NC1=O)C2=CC=CC=C2	4763	50--06--6
meprobamate	NPPQSCRMBWNHMW-UHFFFAOYSA-N	CCCC(C)(COC(=O)N)COC(=O)N	4064	57-53-4
chlormezanone	WEQAYVWKMWHEJO-UHFFFAOYSA-N	CN1C(S(=O)(=O)CCC1=O)C2=CC=C(C=C2)Cl	2717	80-77-3
D-AP5	VOROEQBFPPIACJ-SCSAIBSYSA-N	C(CC(C(=O)O)N)CP(=O)(O)O	135342	79055-68-8	The role of CA3 GABA B receptors on anxiolytic-like behaviors and avoidance memory deficit induced by D-AP5 with respect to Ca 2+ ions	28800869	10.1016/j.pnpbp.2017.08.007
Phenelzine	RMUCZJUITONUFY-UHFFFAOYSA-N	C1=CC=C(C=C1)CCNN	3675	51-71-8	Effects of the antidepressant/antipanic drug phenelzine on alanine and alanine transaminase in rat brain.	11775064	10.1023/A:1012697904299
baclofen	KPYSYYIEGFHWSV-UHFFFAOYSA-N	C1=CC(=CC=C1C(CC(=O)O)CN)Cl	2284	1134-47-0	The role of CA3 GABA B receptors on anxiolytic-like behaviors and avoidance memory deficit induced by D-AP5 with respect to Ca 2+ ions	28800869	10.1016/j.pnpbp.2017.08.007
[3H]8-OH-DPAT	ASXGJMSKWNBENU-UHFFFAOYSA-N	CCCN(CCC)C1CCC2=C(C1)C(=CC=C2)O	1220	78950-78-4	Are postsynaptic 5-HT1A receptors involved in the anxiolytic effects of 5-HT1A receptor agonists and in their inhibitory effects on the firing of serotonergic neurons in the rat?	7853210
gamma-Aminobutyric acid	BTCSSZJGUNDROE-UHFFFAOYSA-N	C(CC(=O)O)CN	119	56 - 12 - 2	[Anxiolytic action of sodium valproate (possible role of gamma-aminobutyric acid in affective disorders)]	2860764
muscimol	ZJQHPWUVQPJPQT-UHFFFAOYSA-N	C1=C(ONC1=O)CN	4266	2763-96-4	[Behavior of high- and low-anxiety rats after modulation of GABAergic transmission in basolateral amygdala]	25665398
suriclone	RMXOUBDDDQUBKD-UHFFFAOYSA-N	CN1CCN(CC1)C(=O)OC2C3=C(C(=O)N2C4=NC5=C(C=C4)C=CC(=N5)Cl)SCCS3	40903	53813-83-5	Controlled comparison of the efficacy and safety of four doses of suriclone, diazepam, and placebo in generalized anxiety disorder	1685793	10.1007/BF02245646
pregnanolone	AURFZBICLPNKBZ-YZRLXODZSA-N	CC(=O)C1CCC2C1(CCC3C2CCC4C3(CCC(C4)O)C)C	31402	128-20-1	Anxiolytic effects of the neuroactive steroid pregnanolone (3 alpha-OH-5 beta-pregnan-20-one) after microinjection in the dorsal hippocampus and lateral septum	10629767	10.1016/s0006-8993(99)02150-2
picrotoxinin	PIMZUZSSNYHVCU-YKWPQBAZSA-N	CC(=C)C1C2C3C4(C(C1C(=O)O2)(CC5C4(O5)C(=O)O3)O)C	442292	17617-45-7	Convulsant/depressant site of action at the allosteric benzodiazepine-GABA receptor-ionophore complex	6139732	10.1016/0024-3205(83)90630-6
alphaxalone（3 alpha-hydroxy-5 alpha-pregnane-11,20-dione）	DUHUCHOQIDJXAT-OLVMNOGESA-N	CC(=O)C1CCC2C1(CC(=O)C3C2CCC4C3(CCC(C4)O)C)C	104845	23930-19-0	Anxiolytic activity of steroid anesthetic alphaxalone	1677035
etomidate	NPUKDXXFDDZOKR-LLVKDONJSA-N	CCOC(=O)C1=CN=CN1C(C)C2=CC=CC=C2	667484	33125-97-2	Benzodiazepine-GABA receptor-ionophore complex. Current concepts	6322040	10.1016/0028-3908(83)90114-4
etazolate	OPQRBXUBWHDHPQ-UHFFFAOYSA-N	CCN1C2=NC=C(C(=C2C=N1)NN=C(C)C)C(=O)OCC	3277	51022-77-6
Vigabatrin	PJDFLNIOAUIZSL-UHFFFAOYSA-N	C=CC(CCC(=O)O)N	5665	68506-86-5	Anxiolytic-like effect of the GABA-transaminase inhibitor vigabatrin (gamma-vinyl GABA) on rat exploratory activity.	7886090	10.1016/0091-3057(94)90226-7
delta-9-tetrahydrocannabinol	CYQFCXCEBYINGO-IAGOWNOFSA-N	CCCCCC1=CC(=C2C3C=C(CCC3C(OC2=C1)(C)C)C)O	16078	1972-08-3	Involvement of the opioid system in the anxiolytic-like effects induced by Delta(9)-tetrahydrocannabinol	12185408	10.1007/s00213-002-1144-9
anandamide	LGEQQWMQCRIYKG-DOFZRALJSA-N	CCCCCC=CCC=CCC=CCC=CCCCC(=O)NCCO	5281969	94421-68-8	Anxiolytic-like properties of the anandamide transport inhibitor AM404	16541083	10.1038/sj.npp.1301061
L-Theanine	DATAGRPVKZEWHA-YFKPBYRVSA-N	CCNC(=O)CCC(C(=O)O)N	439378	3081-61-6	L-theanine in the adjunctive treatment of generalized anxiety disorder: A double-blind, randomised, placebo-controlled trial	30580081	10.1016/j.jpsychires.2018.12.014
Valerenic acid	FEBNTWHYQKGEIQ-SUKRRCERSA-N	CC1CCC(C2=C(CCC12)C)C=C(C)C(=O)O	6440940	3569-10-6	Valerian extract characterized by high valerenic acid and low acetoxy valerenic acid contents demonstrates anxiolytic activity	22944521	10.1016/j.phymed.2012.08.003
Xanthohumol	ORXQGKIUCDPEAJ-YRNVUSSQSA-N	CC(=CCC1=C(C(=C(C=C1O)OC)C(=O)C=CC2=CC=C(C=C2)O)O)C	639665	6754-58-1	Investigation of the anxiolytic effects of xanthohumol, a component of humulus lupulus (Hops), in the male Sprague-Dawley rat	23923669
geniposide	IBFYXTRXDNAPMM-BVTMAQQCSA-N	COC(=O)C1=COC(C2C1CC=C2CO)OC3C(C(C(C(O3)CO)O)O)O	107848	24512-63-8	Geniposide protects depression through BTK/JAK2/STAT1 signaling pathway in lipopolysaccharide-induced depressive mice	33561536	10.1016/j.brainresbull.2021.02.008
chlorogenic acid	CWVRJTMFETXNAD-JUHZACGLSA-N	C1C(C(C(CC1(C(=O)O)O)OC(=O)C=CC2=CC(=C(C=C2)O)O)O)O	1794427	202650-88-2	Chlorogenic acid, a polyphenol from Prunus domestica (Mirabelle), with coupled anxiolytic and antioxidant effects	17698084	10.1016/j.jns.2007.06.028
caffeic acid	QAIPRVGONGVQAS-DUXPYHPUSA-N	C1=CC(=C(C=C1C=CC(=O)O)O)O	689043	501-16-6	Caffeic acid produces antidepressive- and/or anxiolytic-like effects through indirect modulation of the alpha 1A-adrenoceptor system in mice	12802204	10.1097/01.wnr.0000073427.02536.b0
baicalin	IKIIZLYTISPENI-ZFORQUDYSA-N	C1=CC=C(C=C1)C2=CC(=O)C3=C(C(=C(C=C3O2)OC4C(C(C(C(O4)C(=O)O)O)O)O)O)O	64982	21967-41-9	GABA A receptor subtype selectivity underlying selective anxiolytic effect of baicalin	18723037	10.1016/j.neuropharm.2008.07.040
wogonin	XLTFNNCXVBYBSX-UHFFFAOYSA-N	COC1=C(C=C(C2=C1OC(=CC2=O)C3=CC=CC=C3)O)O	5281703	632-85-9	Anxiolytic effect of wogonin, a benzodiazepine receptor ligand isolated from Scutellaria baicalensis Georgi	12392823	10.1016/s0006-2952(02)01347-3
Epigallocatechin	XMOCLSLCDHWDHP-IUODEOHRSA-N	C1C(C(OC2=CC(=CC(=C21)O)O)C3=CC(=C(C(=C3)O)O)O)O	65064	970-74-1	Anxiolytic properties of green tea polyphenol (-)-epigallocatechin gallate (EGCG)	16859659	10.1016/j.brainres.2006.06.062
rosmarinic acid	DOUMFZQKYFQNTF-WUTVXBCWSA-N	C1=CC(=C(C=C1CC(C(=O)O)OC(=O)C=CC2=CC(=C(C=C2)O)O)O)O	5281792	20283-92-5	Sedative-hypnotic, anxiolytic and possible side effects of Salvia limbata C. A. Mey. Extracts and the effects of phenological stage and altitude on the rosmarinic acid content	34517061	10.1016/j.jep.2021.114630
carnosic acid	QRYRORQUOLYVBU-VBKZILBWSA-N	CC(C)C1=C(C(=C2C(=C1)CCC3C2(CCCC3(C)C)C(=O)O)O)O	65126	3650-09-7	Therapeutic effects of rosemary ( Rosmarinus officinalis L.) and its active constituents on nervous system disorders	32963731	10.22038/ijbms.2020.45269.10541
quercetin	REFJWTPEDVJJIY-UHFFFAOYSA-N	C1=CC(=C(C=C1C2=C(C(=O)C3=C(C=C(C=C3O2)O)O)O)O)O	5280343	117-39-5	Quercetin mitigates anxiety-like behavior and normalizes hypothalamus-pituitary-adrenal axis function in a mouse model of mild traumatic brain injury	30882424	10.1097/FBP.0000000000000480
kaempferol	IYRMWMYZSQPJKC-UHFFFAOYSA-N	C1=CC(=CC=C1C2=C(C(=O)C3=C(C=C(C=C3O2)O)O)O)O	5280863	520-18-3	Kaempferol Facilitated Extinction Learning in Contextual Fear Conditioned Rats via Inhibition of Fatty-Acid Amide Hydrolase	33066366	10.3390/molecules25204683
oleamide	FATBGEAMYMYZAF-KTKRTIGZSA-N	CCCCCCCCC=CCCCCCCCC(=O)N	5283387	301-02-0	Anxiolytic-like effects of oleamide in group-housed and socially isolated mice	17521793	10.1016/j.pnpbp.2007.04.008
cannabidiol (CBD)	QHMBSVQNZZTUGM-ZWKOTPCHSA-N	CCCCCC1=CC(=C(C(=C1)O)C2C=C(CCC2C(=C)C)C)O	644019	13956-29-1	Cannabidiol in Anxiety and Sleep: A Large Case Series	30624194	10.7812/TPP/18-041
linalool	CDOSHBSSFJOMGT-UHFFFAOYSA-N	CC(=CCCC(C)(C=C)O)C	6549	78-70-6	Effects of inhaled Linalool in anxiety, social interaction and aggressive behavior in mice	19962290	10.1016/j.phymed.2009.10.002
Luteolin	IQPNAANSBPBGFQ-UHFFFAOYSA-N	C1=CC(=C(C=C1C2=CC(=O)C3=C(C=C(C=C3O2)O)O)O)O	5280445	491-70-3	Anxiolytic effects of the flavonoid luteolin in a mouse model of acute colitis	31878979	10.1186/s13041-019-0539-z
6-bromo-3'-nitroflavone	VTDTVOAYRLEPSB-UHFFFAOYSA-N	C1=CC=C(C=C1)C2=C(C(=O)C3=C(O2)C=CC(=C3)Br)[N+](=O)[O-]	129699738		Pharmacological characterization of 6-bromo-3'-nitroflavone, a synthetic flavonoid with high affinity for the benzodiazepine receptors	9768558	10.1016/s0091-3057(98)00088-4
linarin	YFVGIJBUXMQFOF-PJOVQGMDSA-N	CC1C(C(C(C(O1)OCC2C(C(C(C(O2)OC3=CC(=C4C(=C3)OC(=CC4=O)C5=CC=C(C=C5)OC)O)O)O)O)O)O)O	5317025	480-36-4	Identification and quantification of the sedative and anticonvulsant flavone glycoside from Chrysanthemum boreale	23325489	10.1007/s12272-013-0015-8
Morin hydrate	MYUBTSPIIFYCIU-UHFFFAOYSA-N	C1=CC(=C(C=C1O)O)C2=C(C(=O)C3=C(C=C(C=C3O2)O)O)O.O	16219651	654055-01-3	Protective Effects of Morin Hydrate on Acute Stress-Induced Behavioral and Biochemical Alterations in Mice	30034650	10.29252/NIRP.BCN.9.3.195
spinosin	VGGSULWDCMWZPO-ODEMIOGVSA-N	COC1=C(C(=C2C(=C1)OC(=CC2=O)C3=CC=C(C=C3)O)O)C4C(C(C(C(O4)CO)O)O)OC5C(C(C(C(O5)CO)O)O)O	155692	72063-39-9	GABA and 5-HT systems are implicated in the anxiolytic-like effect of spinosin in mice	25449359	10.1016/j.pbb.2014.11.003
Chrysin	RTIXKCRFFJGDFG-UHFFFAOYSA-N	C1=CC=C(C=C1)C2=CC(=O)C3=C(C=C(C=C3O2)O)O	5281607	480-40-0	Behavioral characterisation of the flavonoids apigenin and chrysin	10930722	10.1016/s0367-326x(00)00186-6
Rutin	IKGXIBQEEMLURG-NVPNHPEKSA-N	CC1C(C(C(C(O1)OCC2C(C(C(C(O2)OC3=C(OC4=CC(=CC(=C4C3=O)O)O)C5=CC(=C(C=C5)O)O)O)O)O)O)O)O	5280805	153-18-4	Effect of rutin on anxiety-like behavior and activity of acetylcholinesterase isoforms in specific brain regions of pentylenetetrazol-treated mice	31747631	10.1016/j.yebeh.2019.106632
apigenin	KZNIFHPLKGYRTM-UHFFFAOYSA-N	C1=CC(=CC=C1C2=CC(=O)C3=C(C=C(C=C3O2)O)O)O	5280443	520-36-5	Anxiolytic natural and synthetic flavonoid ligands of the central benzodiazepine receptor have no effect on memory tasks in rats	22370792	10.1007/s12272-012-0218-4
6,3'-dinitroflavoine	CNVQMRWAJHEFGZ-UHFFFAOYSA-N	C1=CC(=CC(=C1)[N+](=O)[O-])C2=CC(=O)C3=C(O2)C=CC(=C3)[N+](=O)[O-]	127714	100914-36-1		9408191	10.1016/s0091-3057(97)00054-3
5-hydroxy-4'，7-dimethoxyflavanone	CKEXCBVNKRHAMX-HNNXBMFYSA-N	COC1=CC=C(C=C1)C2CC(=O)C3=C(C=C(C=C3O2)OC)O	14057196	29424-96-2	Sedative-hypnotic and anxiolytic effects and the mechanism of action of aqueous extracts of peanut stems and leaves in mice	29572847	10.1002/jsfa.9020
2'-O-methylisoliquiritigenin	PACBGANPVNHGNP-UHFFFAOYSA-N	COC1=C(C=CC(=C1)O)C(=O)C=CC2=CC=C(C=C2)O	25201046	51828-10-5
ferulic acid	KSEBMYQBYZTDHS-HWKANZROSA-N	COC1=C(C=CC(=C1)C=CC(=O)O)O	445858	537-98-4
citral	WTEVQBCEXWBHNA-JXMROGBWSA-N	CC(=CCCC(=CC=O)C)C	638011	141-27-5	Central effects of citral, myrcene and limonene, constituents of essential oil chemotypes from Lippia alba (Mill.) n.e. Brown	12587690	10.1078/094471102321621304
myrcene	UAHWPYUMFXYFJY-UHFFFAOYSA-N	CC(=CCCC(=C)C=C)C	31253	123-35-3
limonene	XMGQYMWWDOXHJM-UHFFFAOYSA-N	CC1=CCC(CC1)C(=C)C	22311	138-86-3
1-nitro-2-phenylethane	XAWCLWKTUKMCMO-UHFFFAOYSA-N	C1=CC=C(C=C1)CC[N+](=O)[O-]	80208	6125-24-2	Hypnotic, anticonvulsant and anxiolytic effects of 1-nitro-2-phenylethane isolated from the essential oil of Dennettia tripetala in mice	23920280	10.1016/j.phymed.2013.07.005
Ginsenoside Rg5	NJUXRKMKOFXMRX-RNCAKNGISA-N	CC(=CCC=C(C)C1CCC2(C1C(CC3C2(CCC4C3(CCC(C4(C)C)OC5C(C(C(C(O5)CO)O)O)OC6C(C(C(C(O6)CO)O)O)O)C)C)O)C)C	11550001	186763-78-0	Anxiolytic-like effects of ginsenosides on the elevated plus-maze model in mice	16141527	10.1248/bpb.28.1621
beta-Sitosterol	KZJWDPNRJALLNS-VJSFXXLFSA-N	CCC(CCC(C)C1CCC2C1(CCC3C2CC=C4C3(CCC(C4)O)C)C)C(C)C	222284	83-46-5	Anxiolytic-like actions of the hexane extract from leaves of Annona cherimolia in two anxiety paradigms: possible involvement of the GABA/benzodiazepine receptor complex	16122763	10.1016/j.lfs.2005.05.078
Honokiol	UYXAWHWODHRRMR-UHFFFAOYSA-N	CC1(C(=O)NC(=O)N(C1=O)C)C2=CCCCC2	3608	56-29-1	Honokiol, a putative anxiolytic agent extracted from magnolia bark, has no diazepam-like side-effects in mice
myricetin	IKMDFBPHZNJCSN-UHFFFAOYSA-N	C1=C(C=C(C(=C1O)O)O)C2=C(C(=O)C3=C(C=C(C=C3O2)O)O)O	5281672	529-44-2	Route of administration determines the anxiolytic activity of the flavonols kaempferol, quercetin and myricetin--are they prodrugs?	21840194	10.1016/j.jnutbio.2011.03.017
Schisantherin A	UFCGDBKFOKKVAC-DSASHONVSA-N	CC1CC2=CC3=C(C(=C2C4=C(C(=C(C=C4C(C1(C)O)OC(=O)C5=CC=CC=C5)OC)OC)OC)OC)OCO3	151529	58546-56-8	Schisantherin A Exerts Sedative and Hypnotic Effects Through Regulating GABA and its Receptor in Mice and Rats
saikosaponin D	KYWSCMDFVARMPN-LCSVLAELSA-N	CC1C(C(C(C(O1)OC2CCC3(C(C2(C)CO)CCC4(C3C=CC56C4(CC(C7(C5CC(CC7)(C)C)CO6)O)C)C)C)O)OC8C(C(C(C(O8)CO)O)O)O)O	107793	20874-52-6	Effects of Bupleurin D on anxiety disorder induced by chronic stress in mice
Jujuboside A	KVKRFLVYJLIZFD-OQVAHBRNSA-N	CC1C(C(C(C(O1)OC2C(C(COC2OC3CCC4(C5CCC6C7C(CC(OC78CC6(C5(CCC4C3(C)C)C)CO8)C=C(C)C)(C)O)C)O)OC9C(C(C(C(O9)COC1C(C(C(C(O1)CO)O)O)O)O)O)OC1C(C(C(CO1)O)O)O)O)O)O	51346169	55466-04-1	Jujuboside A prevents sleep loss-induced disturbance of hippocampal neuronal excitability and memory impairment in young APP/PS1 mice	30872728	10.1038/s41598-019-41114-3
procyanidin B1	XFZJEEAOWLFHDH-UKWJTHFESA-N	C1C(C(OC2=C1C(=CC(=C2C3C(C(OC4=CC(=CC(=C34)O)O)C5=CC(=C(C=C5)O)O)O)O)O)C6=CC(=C(C=C6)O)O)O	11250133	20315-25-7	An investigation into the ameliorating effect of black soybean extract on learning and memory impairment with assessment of neuroprotective effects	25496367	10.1186/1472-6882-14-482
vanillin	MWOOGOJBHIARFG-UHFFFAOYSA-N	COC1=C(C=CC(=C1)C=O)O	1183	121-33-5	Canadian boreal pulp and paper feedstocks contain neuroactive substances that interact in vitro with GABA and dopaminergic systems in the brain	24041600	10.1016/j.scitotenv.2013.08.040
isoeugenol	BJIOGJUNALELMI-ONEGZZNKSA-N	CC=CC1=CC(=C(C=C1)O)OC	853433	97-54-1
Gastrodin	PUQSUZTXKPLAPR-UJPOAAIJSA-N	C1=CC(=CC=C1CO)OC2C(C(C(C(O2)CO)O)O)O	115067	62499-27-8	[Research progress on mechanism of gastrodin and p-hydroxybenzyl alcohol on central nervous system]	32237313	10.19540/j.cnki.cjcmm.20190730.401
p-hydroxybenzyl alcohol	BVJSUAQZOZWCKN-UHFFFAOYSA-N	C1=CC(=CC=C1CO)O	125	623-05-2

## Sheet: NO
name	InChIKey	Canonical SMILES	CID	CAS	literature	PMID	DOI
Methysergide	KPJZHOPZRAFDTN-ZRGWGRIASA-N	CCC(CO)NC(=O)C1CN(C2CC3=CN(C4=CC=CC(=C34)C2=C1)C)C	9681	361-37-5	Methysergide blocks the sleep suppressant action of quipazine in rats	6808546	10.1007/BF00432556
phenoxybenzamine	QZVCTJOXCFMACW-UHFFFAOYSA-N	CC(COC1=CC=CC=C1)N(CCCl)CC2=CC=CC=C2	4768	59-96-1	Phenoxybenzamine and bromocriptine attenuate need for REM sleep in rats	7232462	10.1016/0091-3057(81)90404-4
bromocriptine	OZVBMTJYIDMWIL-AYFBDAFISA-N	CC(C)CC1C(=O)N2CCCC2C3(N1C(=O)C(O3)(C(C)C)NC(=O)C4CN(C5CC6=C(NC7=CC=CC(=C67)C5=C4)Br)C)O	31101	25614-03-3
phytol	BOTWFXYSPFMFNR-PYDDKJGSSA-N	CC(C)CCCC(C)CCCC(C)CCCC(=CCO)C	5280435	150-86-7	Effects of olfactory stimulation with jasmin and its component chemicals on the duration of pentobarbital-induced sleep in mice	1556904	10.1016/0024-3205(92)90346-q
d-lysergic acid diethylamide（LSD）	VAYOSLLFUXYJDT-RDTXWAMCSA-N	CCN(CC)C(=O)C1CN(C2CC3=CNC4=CC=CC(=C34)C2=C1)C	5761	50-37-3	The effect of d-lysergic acid diethylamide (LSD), 2,5-dimethoxy-4-methylamphetamine (DOM), pentobarbital and methaqualone on punished responding in control and 5,7-dihydroxytryptamine-treated rats	7243840	10.1016/0091-3057(81)90121-0
2,5-Dimethoxy-4-methylamphetamine	NTJQREUGJKIARY-UHFFFAOYSA-N	CC1=CC(=C(C=C1OC)CC(C)N)OC	85875	15588-95-1	Behavioral effects of 2,5-dimethoxy-4-methylamphetamine (DOM) in rats and mice	1149803	10.1016/0014-2999(75)90278-2
dopamine	VYFYYTLLBUKUHU-UHFFFAOYSA-N	C1=CC(=C(C=C1CCN)O)O	681	51-61-6	Sleep deprivation decreases binding of [11C]raclopride to dopamine D2/D3 receptors in the human brain	18716203	10.1523/JNEUROSCI.1443-08.2008
norepinephrine	SFLSHLFXELFNJJ-QMMMGPOBSA-N	C1=CC(=C(C=C1C(CN)O)O)O	439260	51-41-2	A role for norepinephrine in arousal, emotion and learning?: limbic modulation by norepinephrine and the Kety hypothesis	3321150	10.1016/0278-5846(87)90015-7
serotonin	QZAYGJVTTNCVMB-UHFFFAOYSA-N	C1=CC2=C(C=C1O)C(=CN2)CCN	5202	50-67-9	Trait Anxiety Mediated by Amygdala Serotonin Transporter in the Common Marmoset	32393533	10.1523/JNEUROSCI.2930-19.2020
2,5-dimethoxy-4-ethylamphetamine (DOET)	HXJKWPGVENNMCC-UHFFFAOYSA-N	CCC1=CC(=C(C=C1OC)CC(C)N)OC	27402	22004-32-6	Role of the 5-HT₂A receptor in the locomotor hyperactivity produced by phenylalkylamine hallucinogens in mice	23376711	10.1016/j.neuropharm.2013.01.014
mescaline	RHCSKNNOAZULRK-UHFFFAOYSA-N	COC1=CC(=CC(=C1OC)OC)CCN	4076	54-04-6
2,5-dimethoxy-4-propylamphetamine (DOPR)	UEEAUFJYLUJWQJ-UHFFFAOYSA-N	CCCC1=CC(=C(C=C1OC)CC(C)N)OC	542051	63779-88-4
2,4,5-trimethoxyamphetamine (TMA-2)	TVSIMAWGATVNGK-UHFFFAOYSA-N	CC(CC1=CC(=C(C=C1OC)OC)OC)N	31014	1083-09-6
4-bromo-3,6-dimethoxybenzocyclobuten-1-yl	GSSMYDFGWDXXJY-UHFFFAOYSA-N	COC1=CC(=C(C2=C1C(=C2)CN)OC)Br	68661455
4-chloro-2,5-dimethoxyamphetamine	ACRITBNCBMTINK-UHFFFAOYSA-N	CC(CC1=CC(=C(C=C1OC)Cl)OC)N	542036	123431-31-2	Rewarding and reinforcing effects of 4-chloro-2,5-dimethoxyamphetamine and AH-7921 in rodents	29626650	10.1016/j.neulet.2018.04.009
4-bromo-2,5-dimethoxyamphetamine（DOB)	FXMWUTGUCAKGQL-UHFFFAOYSA-N	CC(CC1=CC(=C(C=C1OC)Br)OC)N	62065	64638-07-9	Variability in the effects of 4-bromo-2,5-dimethoxyamphetamine (DOB) on operant behavior of squirrel monkeys	3362922	10.1016/0091-3057(88)90157-8
alcohol	LFQSCWFLJHTTHZ-UHFFFAOYSA-N	CCO	702	64-17-5	The novel, selective, brain-penetrant neuropeptide Y Y2 receptor antagonist, JNJ-31020028, tested in animal models of alcohol consumption, relapse, and anxiety	21145691	10.1016/j.alcohol.2010.09.003
caffeine	RYYVLZVUVIJVGH-UHFFFAOYSA-N	CN1C=NC2=C1C(=O)N(C(=O)N2C)C	2519	58-08-2	Caffeine--common ingredient in a diet and its influence on human health	22928360
cocaine	ZPUCINDJVBIVPJ-LJISPDSOSA-N	CN1C2CCC1C(C(C2)OC(=O)C3=CC=CC=C3)C(=O)OC	446220	50-36-2	8-OH DPAT can restore the locomotor stimulant effects of cocaine blocked by haloperidol	10973527	10.1016/s0091-3057(00)00290-2
phencyclidine	JTJMJGYZQZDUJJ-UHFFFAOYSA-N	C1CCC(CC1)(C2=CC=CC=C2)N3CCCCC3	6468	77-10-1	Long-term behavioral and neurodegenerative effects of perinatal phencyclidine administration: implications for schizophrenia	11720778	10.1016/s0306-4522(01)00384-0
levodopa	WTDRDQBEARUVNC-LURJTMIESA-N	C1=CC(=C(C=C1CC(C(=O)O)N)O)O	6047	59-92-7	Effect of histamine H2 receptor antagonism on levodopa-induced dyskinesia in the MPTP-macaque model of Parkinson's disease	20310030	10.1002/mds.23069
Norfloxacin	OGJPXUAPXNRGGI-UHFFFAOYSA-N	CCN1C=C(C(=O)C2=CC(=C(C=C21)N3CCNCC3)F)C(=O)O	4539	70458-96-7	Effect of norfloxacin, a new quinolone, on GABA modulation of TRH-induced TSH release from perifused rat pituitaries	2849275	10.1530/acta.0.1190481
ofloxacin	GSDSWSVVBLHKDQ-UHFFFAOYSA-N	CC1COC2=C3N1C=C(C(=O)C3=CC(=C2N4CCN(CC4)C)F)C(=O)O	4583	82419-36-1	The effect of ofloxacin on pentobarbital-induced sleep in mice	1780346	10.1016/0091-3057(91)90321-r
ephedrine	KWGRBVOPPLSCSI-WPRPVWTQSA-N	CC(C(C1=CC=CC=C1)O)NC	9294	299-42-3	[The Adverse Effects of Ephedra Herb and the Safety of Ephedrine Alkaloids-free Ephedra Herb Extract (EFE)]	31685738	10.1248/yakushi.19-00122
fluoxetine hydrochloride	GIYXAJPCNFJEHY-UHFFFAOYSA-N	CNCCC(C1=CC=CC=C1)OC2=CC=C(C=C2)C(F)(F)F.Cl	62857	56296-78-7	Possible association between fluoxetine hydrochloride and colic in an infant	8282672	10.1097/00004583-199311000-00020
Paroxetine	AHOUBRCZNHFOSL-YOEHRIQHSA-N	C1CNCC(C1C2=CC=C(C=C2)F)COC3=CC4=C(C=C3)OCO4	43815	61869-08-7	Impact of paroxetine on sleep problems in 426 cancer patients receiving chemotherapy: a trial from the University of Rochester Cancer Center Community Clinical Oncology Program	22858235	10.1016/j.sleep.2012.06.001
Letrozole	HPJKCIUCZWXJDR-UHFFFAOYSA-N	C1=CC(=CC=C1C#N)C(C2=CC=C(C=C2)C#N)N3C=NC=N3	3902	112809-51-5	Letrozole. A review of its use in postmenopausal women with advanced breast cancer	9878997	10.2165/00003495-199856060-00020
Capecitabine	GAGWJHPBXLXJQN-UORFTKCHSA-N	CCCCCOC(=O)NC1=NC(=O)N(C=C1F)C2C(C(C(O2)C)O)O	60953	154361-50-9	Patterns of self-reported symptoms in pancreatic cancer patients receiving chemoradiation	17513082	10.1016/j.jpainsymman.2006.11.007
Methyldopa	CJCSPKMFHVPWAR-JTQLQIEISA-N	CC(CC1=CC(=C(C=C1)O)O)(C(=O)O)N	38853	555-30-6	Methyldopa as an inductor of postpartum depression and maternal blues: A review	32413670	10.1016/j.biopha.2020.110196
Liraglutide	YSDQQAXHVYUZIW-QCIJIYAXSA-N	CCCCCCCCCCCCCCCC(=O)NC(CCC(=O)NCCCCC(C(=O)NC(CCC(=O)O)C(=O)NC(CC1=CC=CC=C1)C(=O)NC(C(C)CC)C(=O)NC(C)C(=O)NC(CC2=CNC3=CC=CC=C32)C(=O)NC(CC(C)C)C(=O)NC(C(C)C)C(=O)NC(CCCNC(=N)N)C(=O)NCC(=O)NC(CCCNC(=N)N)C(=O)NCC(=O)O)NC(=O)C(C)NC(=O)C(C)NC(=O)C(CCC(=O)N)NC(=O)CNC(=O)C(CCC(=O)O)NC(=O)C(CC(C)C)NC(=O)C(CC4=CC=C(C=C4)O)NC(=O)C(CO)NC(=O)C(CO)NC(=O)C(C(C)C)NC(=O)C(CC(=O)O)NC(=O)C(CO)NC(=O)C(C(C)O)NC(=O)C…	16134956	204656-20-2	Liraglutide, a GLP-1 Receptor Agonist, Which Decreases Hypothalamic 5-HT2A Receptor Expression, Reduces Appetite and Body Weight Independently of Serotonin Synthesis in Mice	29484303	10.1155/2018/6482958
donepezil	ADEBPBSSDYVVLD-UHFFFAOYSA-N	COC1=C(C=C2C(=C1)CC(C2=O)CC3CCN(CC3)CC4=CC=CC=C4)OC	3152	120014-06-4	[Effects of anti-dementia drugs on sleep-wake patterns in sleep-disturbed rats]	19326812
methylglucamine orotate	QXWPJYVLNHANJZ-LJTMIZJLSA-N	CNCC(C(C(C(CO)O)O)O)O.C1=C(NC(=O)NC1=O)C(=O)O	3035044	59404-17-0	Effects of nootropic drugs on the sleep-waking pattern of the rat	3936493
pyritinol	SIXLXDIJGIWWFU-UHFFFAOYSA-N	CC1=NC=C(C(=C1O)CO)CSSCC2=CN=C(C(=C2CO)O)C	14190	1098-97-1
amphetamine	KWTSXDURSIMDCE-UHFFFAOYSA-N	CC(CC1=CC=CC=C1)N	3007	300-62-9	Simultaneous Determination of Amphetamine-Related New Psychoactive Substances in Urine by Gas Chromatography-Mass Spectrometry	29982540	10.1093/jat/bky037
ketamine	YQEZLKZALYSWHR-UHFFFAOYSA-N	CNC1(CCCCC1=O)C2=CC=CC=C2Cl	3821	6740-88-1	Ketamine and MK-801 decrease acetylcholine release in the pontine reticular formation, slow breathing, and disrupt sleep	12224840
MK-801	LBOJYSIDWZQNJS-CVEARBPZSA-N	CC12C3=CC=CC=C3CC(N1)C4=CC=CC=C24	180081	77086-21-6
modafinil	YFGHCGITMMYXAQ-UHFFFAOYSA-N	C1=CC=C(C=C1)C(C2=CC=CC=C2)S(=O)CC(=O)N	4236	68693-11-8	Modafinil activates cortical and subcortical sites in the sleep-deprived state	17162995	10.1093/sleep/29.11.1471
Methylphenidate	DUGOZIWVEXMGBE-UHFFFAOYSA-N	COC(=O)C(C1CCCCN1)C2=CC=CC=C2	4158	113-45-1	Treatment of narcolepsy: objective studies on methylphenidate, pemoline, and protriptyline	3704451	10.1093/sleep/9.1.260
pemoline	NRNCYVBFPDDJNE-UHFFFAOYSA-N	C1=CC=C(C=C1)C2C(=O)N=C(O2)N	4723	2152-34-3	Evaluation of treatment with stimulants in narcolepsy	7701190	10.1093/sleep/17.suppl_8.s103
methamphetamine.	MYWUZJCMWCOHBA-VIFPVBQESA-N	CC(CC1=CC=CC=C1)NC	10836	537-46-2
isoproterenol	JWZZKOKVBUJMES-UHFFFAOYSA-N	CC(C)NCC(C1=CC(=C(C=C1)O)O)O	3779	7683-59-2	Role of medial preoptic area beta adrenoceptors in the regulation of sleep-wakefulness	9164546	10.1016/s0091-3057(96)00384-x
methoxamine	WJAJPNHVVFWKKL-UHFFFAOYSA-N	CC(C(C1=C(C=CC(=C1)OC)OC)O)N	6082	390-28-3	Effects of methoxamine and alpha-adrenoceptor antagonists, prazosin and yohimbine, on the sleep-wake cycle of the rat	6515252	10.1093/sleep/7.4.365
yohimbine	BLGXFZZNTVWLAY-SCYLSFHTSA-N	COC(=O)C1C(CCC2C1CC3C4=C(CCN3C2)C5=CC=CC=C5N4)O	8969	146-48-5
clenbuterol	STJMRWALKKWQGH-UHFFFAOYSA-N	CC(C)(C)NCC(C1=CC(=C(C(=C1)Cl)N)Cl)O	2783	37148-27-9	Wake-promoting actions of medial basal forebrain beta2 receptor stimulation	15998195	10.1037/0735-7044.119.3.743
apomorphine	VMWNQDUVQKEIOC-CYBMUJFWSA-N	CN1CCC2=C3C1CC4=C(C3=CC=C2)C(=C(C=C4)O)O	6005	58-00-4	Effects of selective adrenoceptor agonists and antagonists on aggressive behavior elicited by apomorphine, DL-dopa and fusaric acid in REM-sleep-deprived rats	1946713	10.1016/0031-9384(91)90517-r
DL-dopa	WTDRDQBEARUVNC-UHFFFAOYSA-N	C1=CC(=C(C=C1CC(C(=O)O)N)O)O	836	63-84-3
fusaric acid	DGMPVYSXXIOGJY-UHFFFAOYSA-N	CCCCC1=CN=C(C=C1)C(=O)O	3442	536-69-6
d-amphetamine	KWTSXDURSIMDCE-QMMMGPOBSA-N	CC(CC1=CC=CC=C1)N	5826	51-64-9	Pharmacological Modulation of Sleep Homeostasis in Rat: Novel Effects of an mGluR2/3 Antagonist	31106825	10.1093/sleep/zsz123
(+/- )3,4-methylenedioxymethamphetamine	SHXWCVYOXRDMCX-UHFFFAOYSA-N	CC(CC1=CC2=C(C=C1)OCO2)NC	1615	42542-10-9	Persistent effects of (+/- )3,4-methylenedioxymethamphetamine (MDMA, "ecstasy") on human sleep	7901886	10.1093/sleep/16.6.560
Haloperidol	LNEPOXFFQSENCJ-UHFFFAOYSA-N	C1CN(CCC1(C2=CC=C(C=C2)Cl)O)CCCC(=O)C3=CC=C(C=C3)F	3559	52-86-8	Case study of circadian rhythm sleep disorder following haloperidol treatment: reversal by risperidone and melatonin	12405556	10.1081/cbi-120014105
Acetylcarnitine	RDHQFKQIGNGIED-MRVPVSSYSA-N	CC(=O)OC(CC(=O)[O-])C[N+](C)(C)C	7045767	3040-38-8	Modifications of the cerebral electric activity induced by the intracerebroventricular injection of acetyl-L-carnitine in cats	2387658
Amisulpride	NTJOBXMMWNYJFB-UHFFFAOYSA-N	CCN1CCCC1CNC(=O)C2=CC(=C(C=C2OC)N)S(=O)(=O)CC	2159	71675-85-9	Effects of 50mg amisulpride on EEG, psychomotor and cognitive functions in healthy sleep-deprived subjects	10520732	10.1111/j.1472-8206.1999.tb00365.x
gamma-hydroxybutyrate (GHB)	SJZRECIVHVDYJC-UHFFFAOYSA-N	C(CC(=O)O)CO	10413	591-81-1	Effects of gamma-hydroxybutyrate on ventral tegmental unit activity in the rat: considerations on rem sleep control	11382872
Atenolol	METKIMKYRPQLGS-UHFFFAOYSA-N	CC(C)NCC(COC1=CC=C(C=C1)CC(=O)N)O	2249	29122-68-7	Comparative effects of atenolol and clonidine on polygraphically recorded sleep in hypertensive men: a randomized, double-blind, crossover study	7711993
Clomipramine	GDLIGKIOYRNHDA-UHFFFAOYSA-N	CN(C)CCCN1C2=CC=CC=C2CCC3=C1C=C(C=C3)Cl	2801	303-49-1	Instrumental REM sleep deprivation in neonates leads to adult depression-like behaviors in rats	14746380	10.1093/sleep/26.8.990
Adrenocorticotropic hormone	IDLFZVILOHSSID-OVLDLUHVSA-N	CC(C)CC(C(=O)NC(CCC(=O)O)C(=O)NC(CC1=CC=CC=C1)C(=O)O)NC(=O)C2CCCN2C(=O)C(CC3=CC=CC=C3)NC(=O)C(C)NC(=O)C(CCC(=O)O)NC(=O)C(C)NC(=O)C(CO)NC(=O)C(CCC(=O)O)NC(=O)C(CC(=O)O)NC(=O)C(CCC(=O)O)NC(=O)C(C)NC(=O)CNC(=O)C(CC(=O)N)NC(=O)C4CCCN4C(=O)C(CC5=CC=C(C=C5)O)NC(=O)C(C(C)C)NC(=O)C(CCCCN)NC(=O)C(C(C)C)NC(=O)C6CCCN6C(=O)C(CCCNC(=N)N)NC(=O)C(CCCNC(=N)N)NC(=O)C(CCCCN)NC(=O)C(CCCCN)NC(=O)CNC(=O)C(C(C)C)NC(=O…	16132265	12427-33-7	Proopiomelanocortin (POMC)-derived peptides and sleep in the rat. Part 1--Hypnogenic properties of ACTH derivatives	1981927	10.1016/0143-4179(90)90042-w
Corticotropin Releasing Factor	PNMZQWKBJIQQJL-FAUHKOHMSA-N	CCC(C)C(C(=O)NC(CO)C(=O)NC(CC(C)C)C(=O)NC(CC(=O)O)C(=O)NC(CC(C)C)C(=O)NC(C(C)O)C(=O)NC(CC1=CC=CC=C1)C(=O)NC(CC2=CNC=N2)C(=O)NC(CC(C)C)C(=O)NC(CC(C)C)C(=O)NC(CCCN=C(N)N)C(=O)NC(CCC(=O)O)C(=O)NC(C(C)C)C(=O)NC(CC(C)C)C(=O)NC(CCC(=O)O)C(=O)NC(CCSC)C(=O)NC(C)C(=O)NC(CCCN=C(N)N)C(=O)NC(C)C(=O)NC(CCC(=O)O)C(=O)NC(CCC(=O)N)C(=O)NC(CC(C)C)C(=O)NC(C)C(=O)NC(CCC(=O)N)C(=O)NC(CCC(=O)N)C(=O)NC(C)C(=O)NC(CC3=C…	44362115
corticotropin-like intermediate lobe peptide	ZYDMZKPAPSZILB-XDGGXQJNSA-N	CC(C)CC(C(=O)NC(CCC(=O)O)C(=O)NC(CC1=CC=CC=C1)C(=O)O)NC(=O)C2CCCN2C(=O)C(CC3=CC=CC=C3)NC(=O)C(C)NC(=O)C(CCC(=O)O)NC(=O)C(C)NC(=O)C(CO)NC(=O)C(CCC(=O)O)NC(=O)C(CC(=O)O)NC(=O)C(CCC(=O)O)NC(=O)C(C)NC(=O)CNC(=O)C(CC(=O)N)NC(=O)C4CCCN4C(=O)C(CC5=CC=C(C=C5)O)NC(=O)C(C(C)C)NC(=O)C(CCCCN)NC(=O)C(C(C)C)NC(=O)C6CCCN6C(=O)C(CCCNC(=N)N)N	16130980	53917-42-3
Dexfenfluramine	DBGIVFWFUFKIQN-VIFPVBQESA-N	CCNC(C)CC1=CC(=CC=C1)C(F)(F)F	66265	3239-44-9	Psychological and metabolic effects of dietary carbohydrates and dexfenfluramine during a low-energy diet in obese women	8092082	10.1093/ajcn/60.4.488
diphenylarsinic acid	SKYRWWOGLYJNCD-UHFFFAOYSA-N	C1=CC=C(C=C1)[As](=O)(C2=CC=CC=C2)O	20770	4656-80-8	[Ten-years records of organic arsenic (diphenylarsinic acid) poisoning: epidemiology, clinical feature, metabolism, and toxicity]	25585431	10.11477/mf.1416200081
Fenfluramine	DBGIVFWFUFKIQN-UHFFFAOYSA-N	CCNC(C)CC1=CC(=CC=C1)C(F)(F)F	3337	458-24-2	Sleep suppressant action of fenfluramine in rats. II. Evidence against the involvement of presynaptic serotonergic mechanism	6223135
Fleroxacin	XBJBPGROQZJDOJ-UHFFFAOYSA-N	CN1CCN(CC1)C2=C(C=C3C(=C2F)N(C=C(C3=O)C(=O)O)CCF)F	3357	79660-72-3	Fleroxacin 400 mg once daily versus ofloxacin 400 mg twice daily in skin and soft tissue infections	9309373	10.1159/000239593
Isocarboxazid	XKFPYPQQHFEXRZ-UHFFFAOYSA-N	CC1=CC(=NO1)C(=O)NNCC2=CC=CC=C2	3759	59-63-2	Side effects of isocarboxazid	6376485
Lisdexamfetamine Dimesylate	CETWSOHVEGTIBR-FORAGAHYSA-N	CC(CC1=CC=CC=C1)NC(=O)C(CCCCN)N.CS(=O)(=O)O.CS(=O)(=O)O	11597697	608137-33-3	Effect of lisdexamfetamine dimesylate on sleep in adults with attention-deficit/hyperactivity disorder	19650932	10.1186/1744-9081-5-34
lovastatin	PCZOHLXUXFIOCF-BXMDZJJMSA-N	CCC(C)C(=O)OC1CC(C=C2C1C(C(C=C2)C)CCC3CC(CC(=O)O3)O)C	53232	75330-75-5	Comparison of the effects of pravastatin and lovastatin on sleep disturbance in hypercholesterolemic subjects	9989373	10.1093/sleep/22.1.117
pravastatin	TUZYXOIXSAXUGO-PZAWKZKUSA-N	CCC(C)C(=O)OC1CC(C=C2C1C(C(C=C2)C)CCC(CC(CC(=O)O)O)O)O	54687	81093-37-0
Mefloquine	XEEQGYMUWCZPDN-UHFFFAOYSA-N	C1CCNC(C1)C(C2=CC(=NC3=C2C=CC=C3C(F)(F)F)C(F)(F)F)O	4046	49752-90-1	[Mood disorder after malaria prophylaxis with mefloquine (two case reports)]	22032283	10.1016/j.encep.2011.01.013
milnacipran	GJJFMKBJSRMPLA-HIFRSBDPSA-N	CCN(CC)C(=O)C1(CC1CN)C2=CC=CC=C2	65833	96847-55-1	Sleep disturbance associated with an enhanced orexinergic system induced by chronic treatment with paroxetine and milnacipran	21157932	10.1002/syn.20893
minocycline	FFTVPQUHLQBXQZ-KVUCHLLUSA-N	CN(C)C1C2CC3CC4=C(C=CC(=C4C(=C3C(=O)C2(C(=C(C1=O)C(=O)N)O)O)O)O)N(C)C	54675783	10118-90-8	Evidence for neuroinflammatory and microglial changes in the cerebral response to sleep loss	21358843	10.1093/sleep/34.3.261
Moclobemide	YHXISWVBGDMDLQ-UHFFFAOYSA-N	C1COCCN1CCNC(=O)C2=CC=C(C=C2)Cl	4235	71320-77-9	A cross-study comparison of the effects of moclobemide and brofaromine on actual driving performance and estimated sleep	7954488	10.1097/00002826-199417001-00003
brofaromine	WZXHSWVDAYOFPE-UHFFFAOYSA-N	COC1=CC(=C2C(=C1)C=C(O2)C3CCNCC3)Br	44571	63638-91-5
naltrexone	DQCKKXVULJGBQN-XFWGSAIBSA-N	C1CC1CN2CCC34C5C(=O)CCC3(C2CC6=C4C(=C(C=C6)O)O5)O	5360515	16590-41-3	Sleep and the Pharmacotherapy of Alcohol Use Disorder: Unfortunate Bedfellows. A Systematic Review With Meta-Analysis	31680952	10.3389/fphar.2019.01164
nalmefene	WJBLNOPPDWQMCH-MBPVOVBZSA-N	C=C1CCC2(C3CC4=C5C2(C1OC5=C(C=C4)O)CCN3CC6CC6)O	5284594	55096-26-9
Valganciclovir	WPVFJKSGQUFQAP-GKAPJAKFSA-N	CC(C)C(C(=O)OCC(CO)OCN1C=NC2=C1N=C(NC2=O)N)N	135413535	175865-60-8	Valganciclovir	11465875	10.2165/00003495-200161080-00013
Venlafaxine Hydrochloride	QYRYFNHXARDNFZ-UHFFFAOYSA-N	CN(C)CC(C1=CC=C(C=C1)OC)C2(CCCCC2)O.Cl	62923	99300-78-4	A double-blind, placebo-controlled evaluation of the effects of orally administered venlafaxine on sleep in inpatients with major depression	8993085
ginkgolide B	SQOJOAFXDQDRGF-UHFFFAOYSA-N	CC1C(=O)OC2C1(C34C(=O)OC5C3(C2O)C6(C(C5)C(C)(C)C)C(C(=O)OC6O4)O)O	65243	15291-77-7	Intraperitoneal injection of ginkgolide B, a major active compound of Ginkgo biloba, dose-dependently increases the amount of wake and decreases non-rapid eye movement sleep in C57BL/6 mice	32050100	10.1016/j.neulet.2020.134832
Doxorubicin	AOJJSUZBOXZQNB-TZSSRYMLSA-N	CC1C(C(CC(O1)OC2CC(CC3=C2C(=C4C(=C3O)C(=O)C5=C(C4=O)C(=CC=C5)OC)O)(C(=O)CO)O)N)O	31703	23214-92-8	Sleep pattern and locomotor activity are impaired by doxorubicin in non-tumor-bearing rats	28123667	10.1016/j.slsci.2016.10.006
Cadmium Chloride	YKYOUMDCQGMQQO-UHFFFAOYSA-L	Cl[Cd]Cl	24947	10108-64-2	[The effect of cadmium on the wakefulness-sleep cycle in rats in early postnatal ontogeny]	9054174
Arsenic	RQNWIZPPADIBDY-UHFFFAOYSA-N	[As]	5359596	7440-38-2	Patient-Reported Outcomes of Arsenic-Related Skin Lesions in China	33015173	10.1155/2020/6195975
Endosulfan	RDYMFSUJUZBWLH-UHFFFAOYSA-N	C1C2C(COS(=O)O1)C3(C(=C(C2(C3(Cl)Cl)Cl)Cl)Cl)Cl	3224	33213-65-9	Effect of endosulfan pretreatment on organ weights and on pentobarbital hypnosis in rats	888146	10.1016/0300-483x(77)90048-8
Pyruvic Acid	LCTONWCANYUPML-UHFFFAOYSA-N	CC(=O)C(=O)O	1060	127-17-3	Indole-3-pyruvic acid as a possible hypnotic agent in insomniac subjects	1748233	10.1177/030006059101900507
Formaldehyde	WSFSSNUMVMOOMR-UHFFFAOYSA-N	C=O	712	50-00-0	Neurobehavioral and respiratory symptoms of formaldehyde and xylene exposure in histology technicians	4051579	10.1080/00039896.1985.10545924
toluene	YXFVVABEGXRONW-UHFFFAOYSA-N	CC1=CC=CC=C1	1140	108-88-3
Bexarotene	NAVMQTYZDKMPEU-UHFFFAOYSA-N	CC1=CC2=C(C=C1C(=C)C3=CC=C(C=C3)C(=O)O)C(CCC2(C)C)(C)C	82146	153559-49-0	The retinoid X receptor: a nuclear receptor that modulates the sleep-wake cycle in rats	32472163	10.1007/s00213-020-05518-8
manganese	PWHULOQIROXLJO-UHFFFAOYSA-N	[Mn]	23930	7439-96-5	[Sleep stages and growth hormone in manganese poisoning. Effects of L dopa]	232604
kainic acid	VLSMHEGGTFMBBZ-OOZYFLPDSA-N	CC(=C)C1CNC(C1CC(=O)O)C(=O)O	10255	487-79-6	Neuro-protective effects of carbamazepine on sleep patterns and head and body shakes in kainic acid-treated rats	19414003	10.1016/j.cbi.2009.04.007
Aspirin	BSYNRYMUTXBXSQ-UHFFFAOYSA-N	CC(=O)OC1=CC=CC=C1C(=O)O	2244	50-78-2	Slow wave sleep elevations after body heating: proximity to sleep and effects of aspirin	3659736	10.1093/sleep/10.4.383
Taurine	XOAAWQZATWQOTB-UHFFFAOYSA-N	C(CS(=O)(=O)O)N	1123	107-35-7	Effect of taurine and caffeine on sleep-wake activity in Drosophila melanogaster	23616711	10.2147/NSS.S13034
Sarin	DYAHQFWOVKZOOW-UHFFFAOYSA-N	CC(C)OP(=O)(C)F	7871	107-44-8	Insomnia as a sequela of sarin toxicity several years after exposure in Tokyo subway trains	16158698	10.2466/pms.100.3c.1121-1126
Pilocarpine	QCHFTSOMWOSFHM-WPRPVWTQSA-N	CCC1C(COC1=O)CC2=CN=CN2C	5910	92-13-7	Pilocarpine, an orally active muscarinic cholinergic agonist, induces REM sleep and reduces delta sleep in normal volunteers	2243887	10.1016/0165-1781(90)90064-c
Vinyl Chloride	BZHJMEDXRYGGRV-UHFFFAOYSA-N	C=CCl	6338	27398	[Effect of vinyl chloride and its polymers on the nervous system]	3249613
DL-4-chlorophenylalanine	NIGWMJHCCYYCSF-UHFFFAOYSA-N	C1=CC(=CC=C1CC(C(=O)O)N)Cl	4652	7424-00-2	Sleep peptide complex of jujube kernel and Lily can improve sleep of insomnia model rats
aminophylline	FQPFAHBPWDRTLU-UHFFFAOYSA-N	CN1C2=C(C(=O)N(C1=O)C)NC=N2.CN1C2=C(C(=O)N(C1=O)C)NC=N2.C(CN)N	9433	317-34-0	Aminophylline shortens thiopental sleep-time and enhances noradrenergic neurotransmission in rats	3021279	10.1016/0006-8993(86)90044-2
fluoxetine	RTHCYVBBDHJXIQ-UHFFFAOYSA-N	CNCCC(C1=CC=CC=C1)OC2=CC=C(C=C2)C(F)(F)F	3386	54910-89-3	Effects of Antidepressants on Sleep	28791566	10.1007/s11920-017-0816-4
venlafaxine	PNVNVHUZROJLTJ-UHFFFAOYSA-N	CN(C)CC(C1=CC=C(C=C1)OC)C2(CCCCC2)O	5656	93413-69-5
propranolol	AQHHHDLHHXJYJD-UHFFFAOYSA-N	CC(C)NCC(COC1=CC=CC2=CC=CC=C21)O	4946	525-66-6	Propranolol: long-term treatment in narcolepsy-cataplexy	3925525	10.1093/sleep/8.2.95
metoprolol	IUBSYMUCCVWXPE-UHFFFAOYSA-N	CC(C)NCC(COC1=CC=C(C=C1)CCOC)O	4171	51384-51-1	Influence of cilazapril on memory functions and sleep behaviour in comparison with metoprolol and placebo in healthy subjects	2527538	10.1111/j.1365-2125.1989.tb03489.x
flunarizine	SMANXXCATUTDDT-QPJJXVBHSA-N	C1CN(CCN1CC=CC2=CC=CC=C2)C(C3=CC=C(C=C3)F)C4=CC=C(C=C4)F	941361	52468-60-7	Insomnia and perceptual disturbances during flunarizine treatment	2303350	10.1111/j.1526-4610.1990.hed3002062.x
nicotine	SNICXCGAKADSCV-JTQLQIEISA-N	CN1CCCC1C2=CN=CC=C2	89594	54--11--5	Chronologically overlapping occurrences of nicotine-induced anxiety- and depression-related behavioral symptoms: effects of anxiolytic and cannabinoid drugs	17877812	10.1186/1471-2202-8-76
flumazenil	OFBIFZUFASYYRE-UHFFFAOYSA-N	CCOC(=O)C1=C2CN(C(=O)C3=C(N2C=N1)C=CC(=C3)F)C	3373	78755-81-4	Effect of single doses of pindolol and d-fenfluramine on flumazenil-induced anxiety in panic disorder patients	29113874	10.1016/j.bbr.2017.11.002
methiodide	INQOMBQAUSQDDS-UHFFFAOYSA-N	CI	6328	74-88-4	[Behavior of high- and low-anxiety rats after modulation of GABAergic transmission in basolateral amygdala]	25665398
Bicuculline methiodide	HKJKCPKPSSVUHY-GRTNUQQKSA-M	C[N+]1(CCC2=CC3=C(C=C2C1C4C5=C(C6=C(C=C5)OCO6)C(=O)O4)OCO3)C.[I-]	104871	40709-69-1	GABA(A) receptor antagonism in the ventrocaudal periaqueductal gray increases anxiety in the anxiety-resistant postpartum rat	20331998	10.1016/j.pbb.2010.03.007
(+)-bicuculline	IYGYMKDQCDOMRE-ZWKOTPCHSA-N	CN1CCC2=CC3=C(C=C2C1C4C5=C(C6=C(C=C5)OCO6)C(=O)O4)OCO3	10237	485-49-4
FG 7142	QMCOPDWHWYSJSA-UHFFFAOYSA-N	CNC(=O)C1=NC=C2C(=C1)C3=CC=CC=C3N2	4375	78538-74-6	Chronic treatment with imipramine does not reverse the effects of 3 anxiogenic compounds in a test of anxiety in the rat	2894617	10.1159/000118363
pentylenetetrazole	CWRVKFFCRWGWCS-UHFFFAOYSA-N	C1CCC2=NN=NN2CC1	5917	54-95-5
pindolol	JZQKKSLKJUAGIC-UHFFFAOYSA-N	CC(C)NCC(COC1=CC=CC2=C1C=CN2)O	4828	13523-86-9	Effect of single doses of pindolol and d-fenfluramine on flumazenil-induced anxiety in panic disorder patients	29113874	10.1016/j.bbr.2017.11.002
picrotoxin	VJKUPQSHOVKBCO-ZTYBEOBUSA-N	CC(=C)C1C2C3C4(C(C1C(=O)O2)(CC5C4(O5)C(=O)O3)O)C.CC12C3C4C(C(C1(CC5C2(O5)C(=O)O3)O)C(=O)O4)C(C)(C)O	31304	124-87-8	Tannins from Terminalia chebula fruits attenuates GABA antagonist-induced anxiety-like behaviour via modulation of neurotransmitters	30198561	10.1111/jphp.13007
phaclofen	VSGNGLJPOGUDON-UHFFFAOYSA-N	C1=CC(=CC=C1C(CN)CP(=O)(O)O)Cl	1641	114012-12-3	The role of CA3 GABA B receptors on anxiolytic-like behaviors and avoidance memory deficit induced by D-AP5 with respect to Ca 2+ ions	28800869	10.1016/j.pnpbp.2017.08.007
URB597	ROFVXGGUISEHAM-UHFFFAOYSA-N	C1CCC(CC1)NC(=O)OC2=CC=CC(=C2)C3=CC(=CC=C3)C(=O)N	1383884	546141-08-6	Role of endocannabinoid system in the ventral hippocampus of rats in the modulation of anxiety-like behaviours	19614892	10.1111/j.1742-7843.2009.00449.x
Naloxone	UZHSEJADLWPNLE-GRGSLBFTSA-N	C=CCN1CCC23C4C(=O)CCC2(C1CC5=C3C(=C(C=C5)O)O4)O	5284596	465-65-6	Naloxone blocks the antianxiety but not the motor effects of benzodiazepines and pentobarbital: experimental studies and literature review	7480551	10.1007/BF02246192
Lactate	JVTAAEKCZFNVCJ-UHFFFAOYSA-M	CC(C(=O)[O-])O	91435	113-21-3	Lactate-induced anxiety after imipramine and diazepam treatment	9160549	10.1002/anxi.3070010204
