# Supplementary material for: Structure-guided discovery of food-derived GABA-T inhibitors as hunters for anti-anxiety compounds
Source: Royal Society of Chemistry journal article supplement (doi:10.1039/d2fo01315k), 2022-01-01
Supplement: d2fo01315k11.pdf [file d2fo01315k11.pdf]

## Supplement Figures

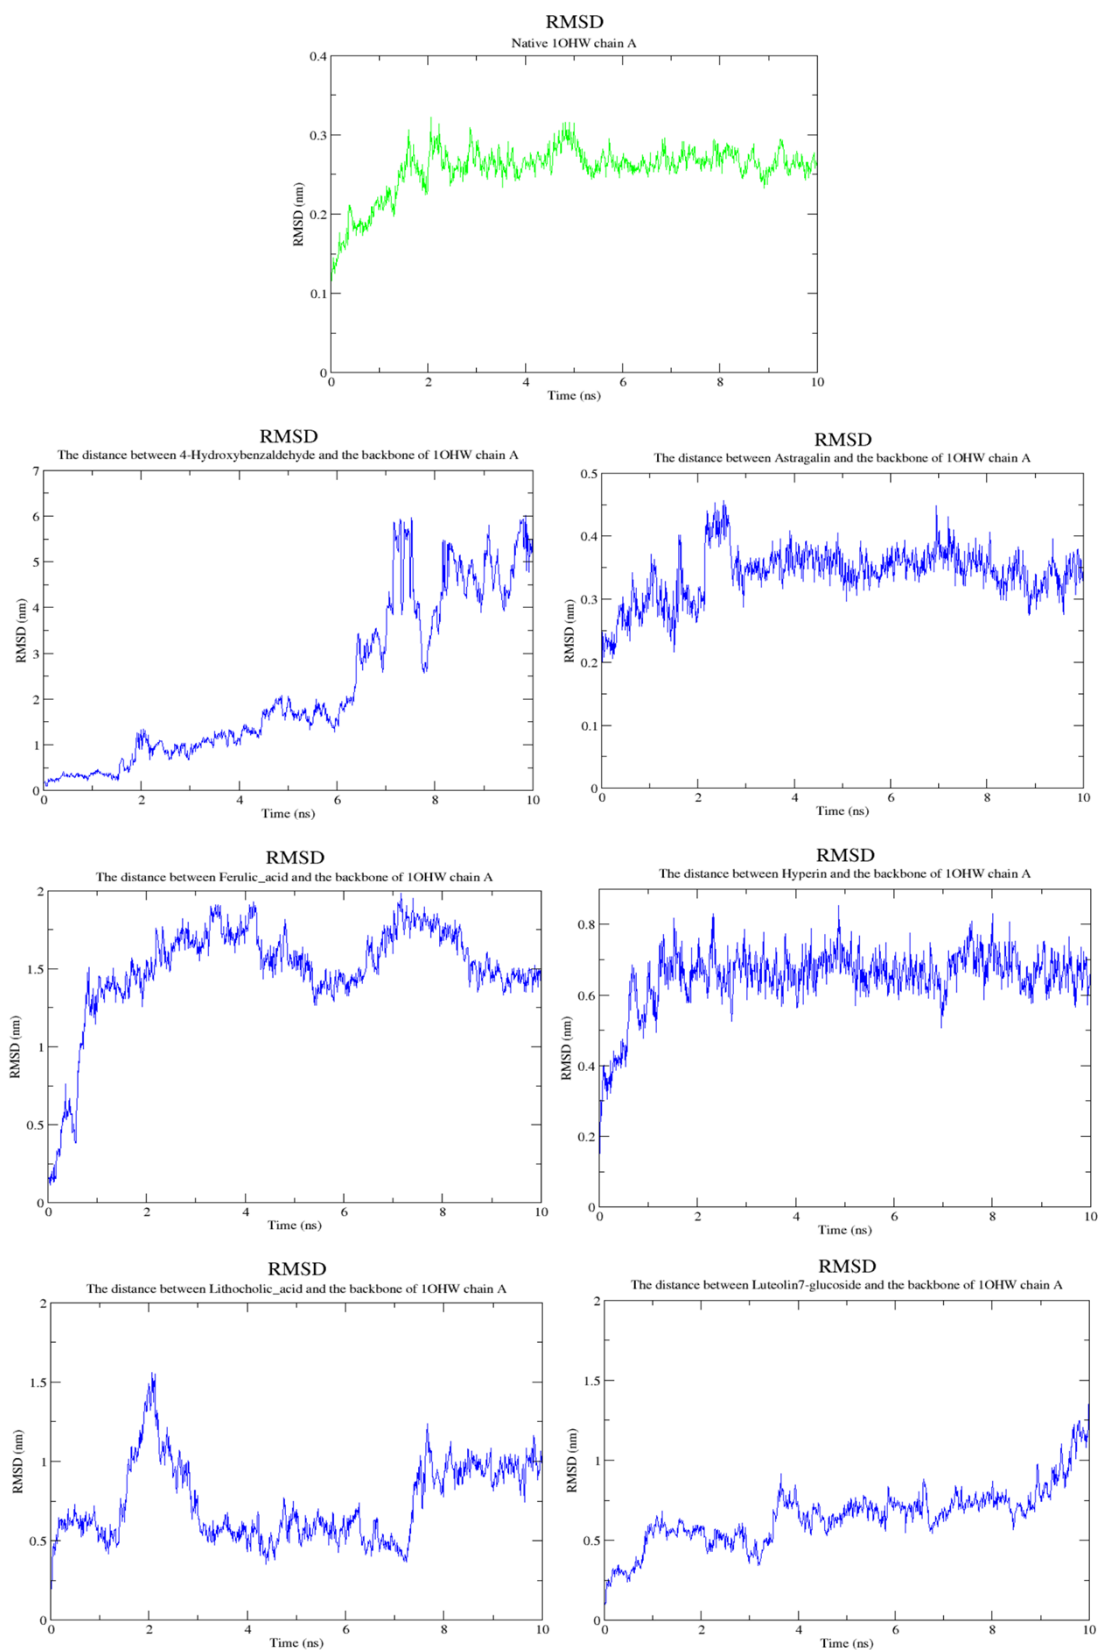

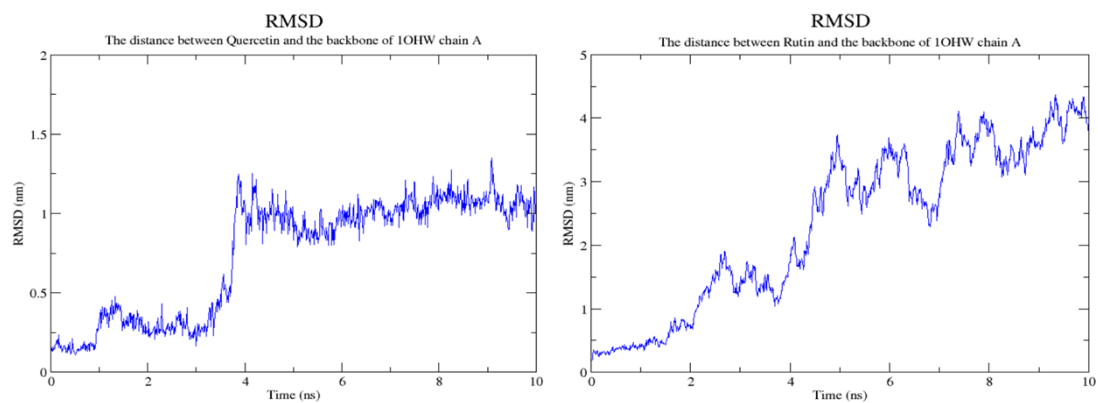

Supplement fig.1 Root Mean Square Deviation (RMSD) analysis of native 1OHW chain A and the complexes of 1OHW chain A with several compounds for 10 ns molecular dynamics simulation.

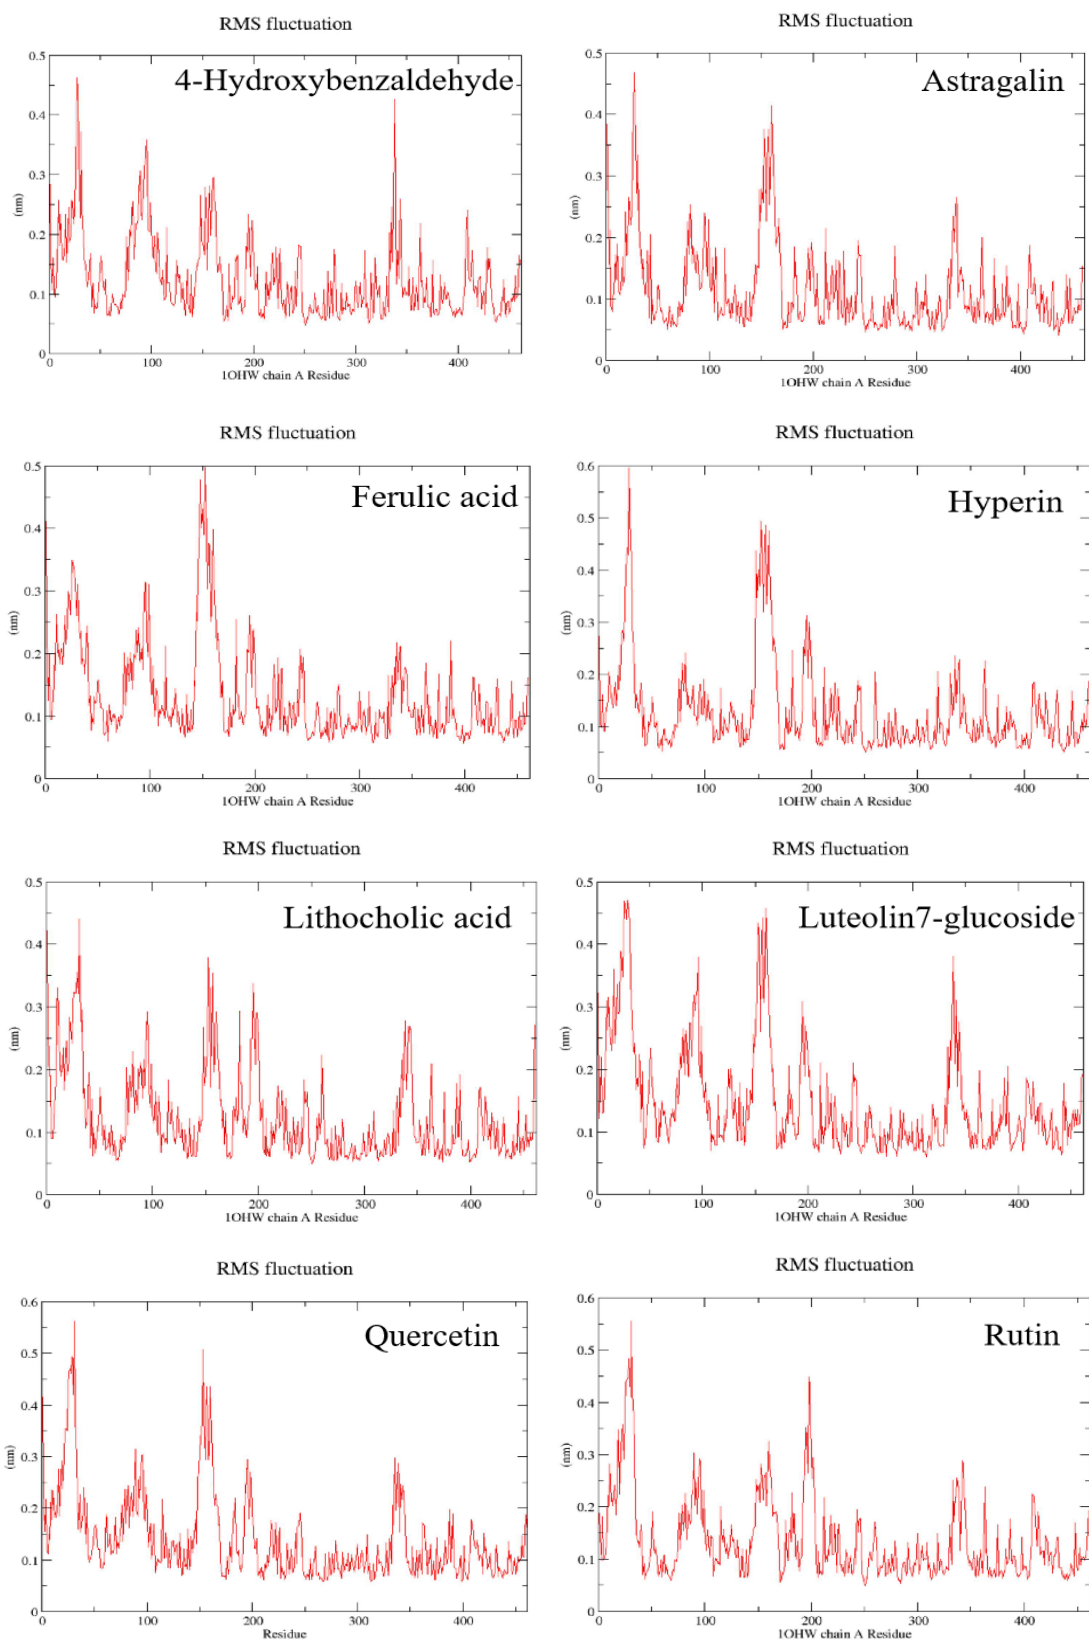

Supplement fig.2 RMS fluctuation (RMSF) analysis of residues of 1OHW chain A for 10 ns molecular dynamics simulation.

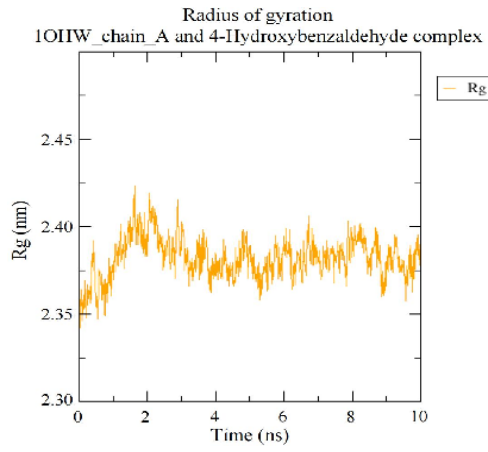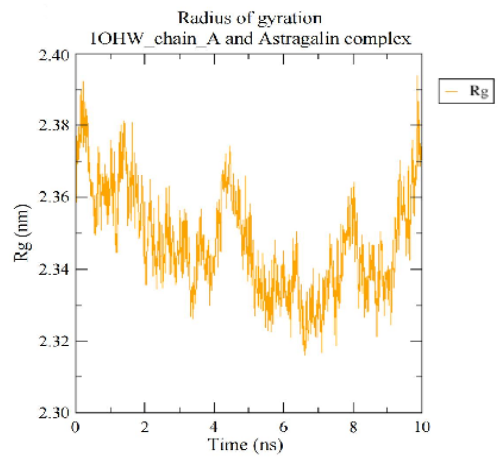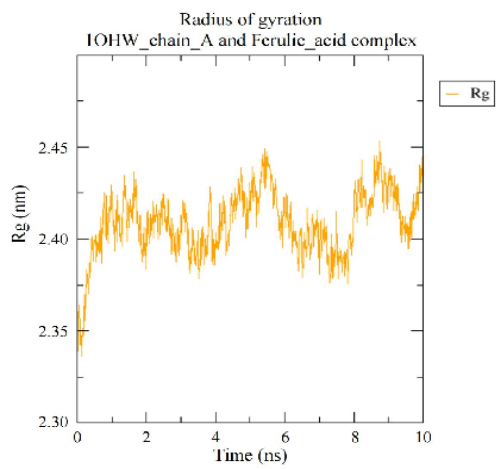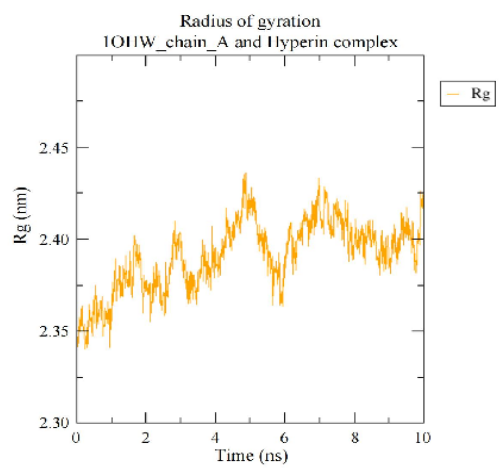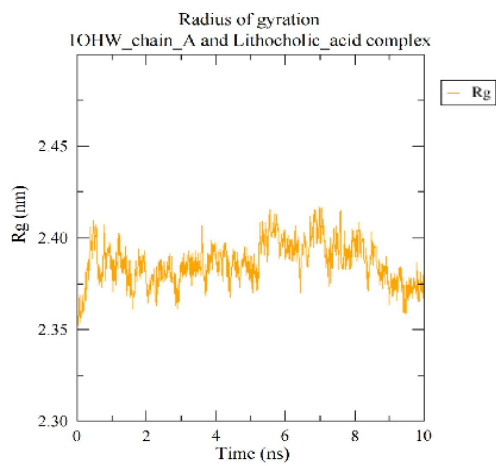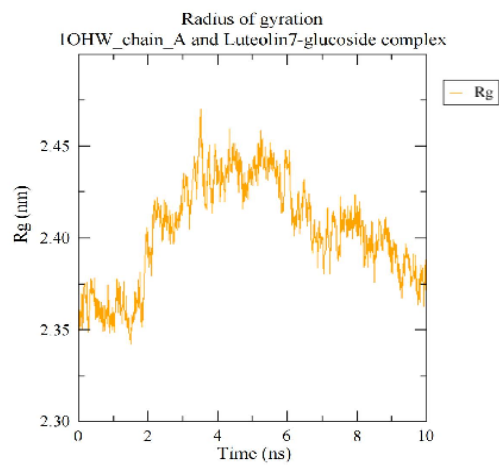

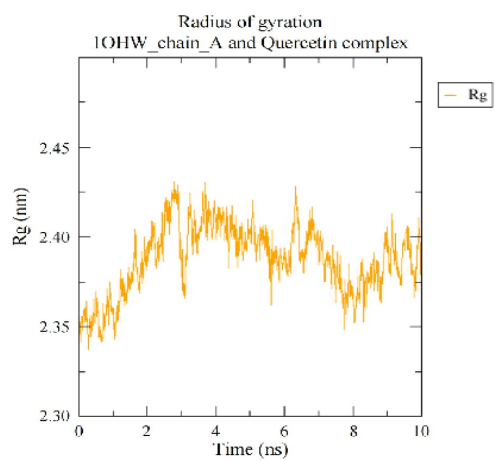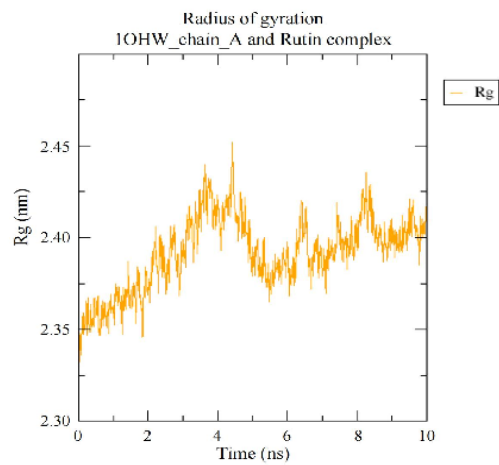

Supplement fig.3 Radius of gyration (Rg) analysis of the complexes of 1OHW chain A with several compounds for 10 ns molecular dynamics simulation.

Solvent Accessible Surface Area

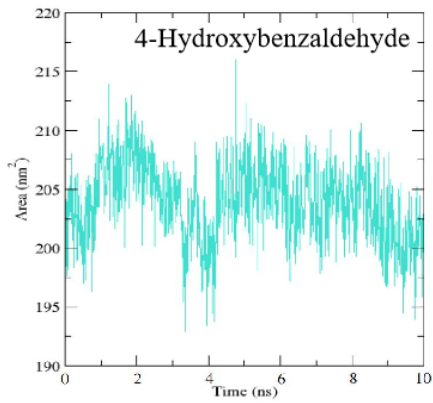

Solvent Accessible Surface Area

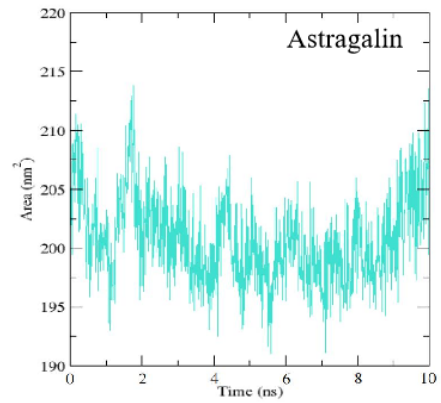

Solvent Accessible Surface Area

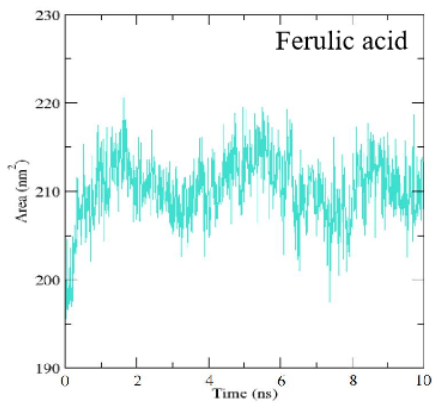

Solvent Accessible Surface Area

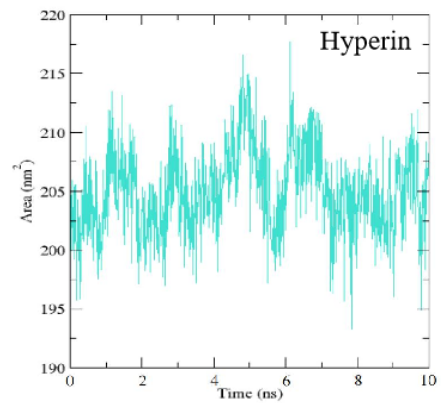

Solvent Accessible Surface Area

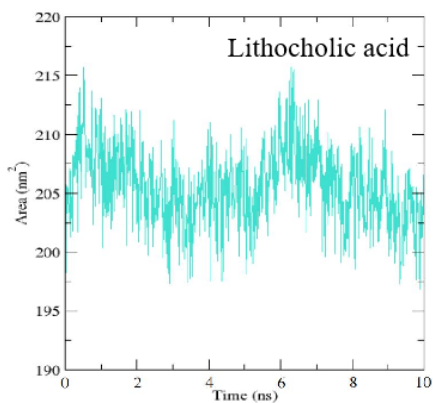

Solvent Accessible Surface Area

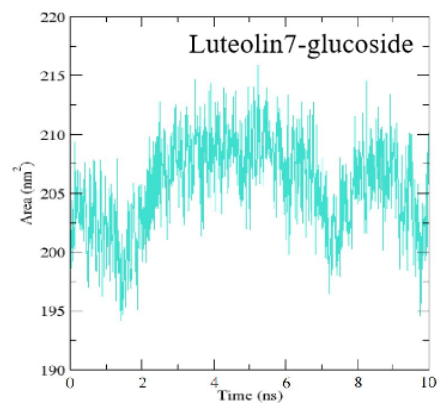

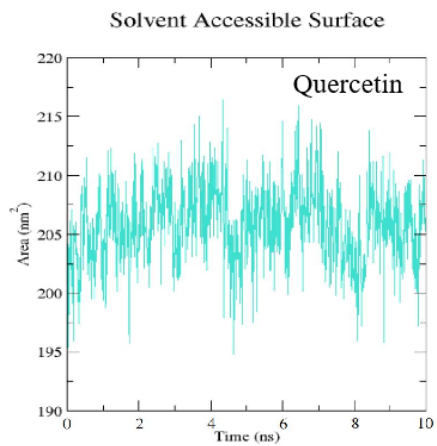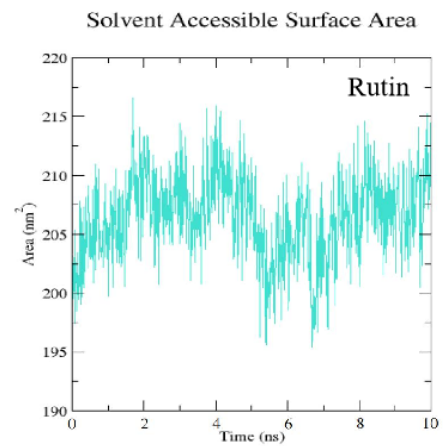

Supplement fig.4 Solvent Accessible Surface Area (SASA) analysis of 1OHW chain A interacting with several compounds for 10 ns molecular dynamics simulation.

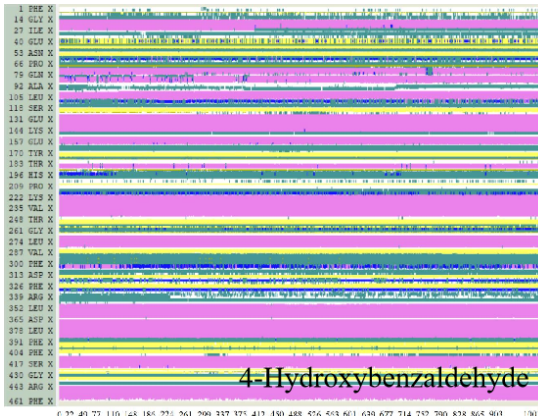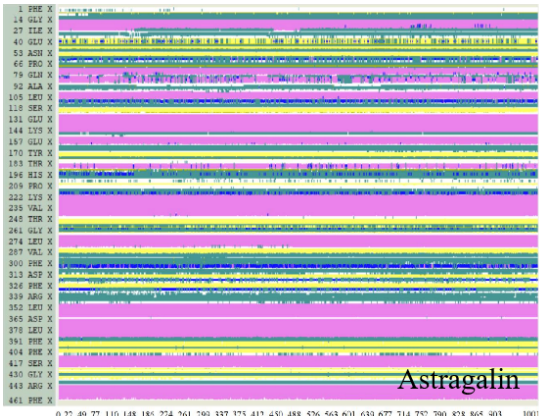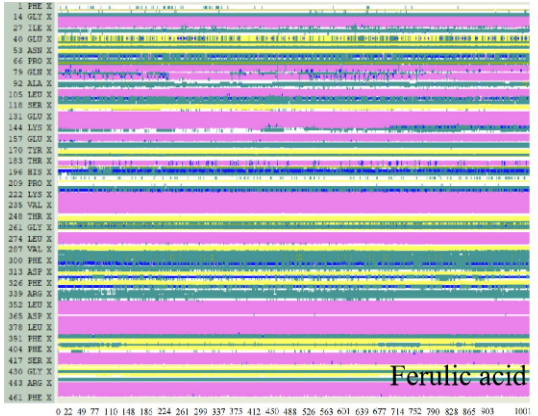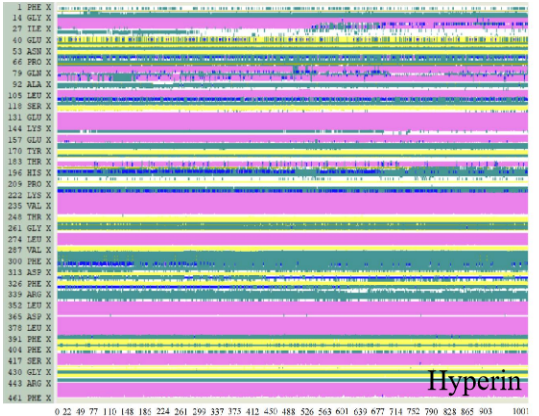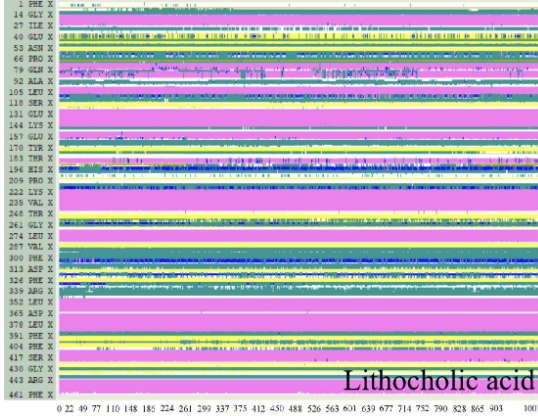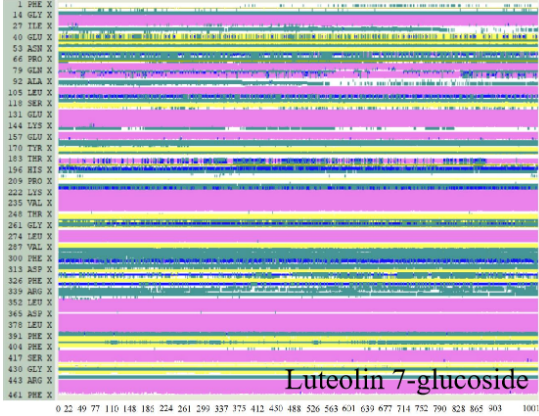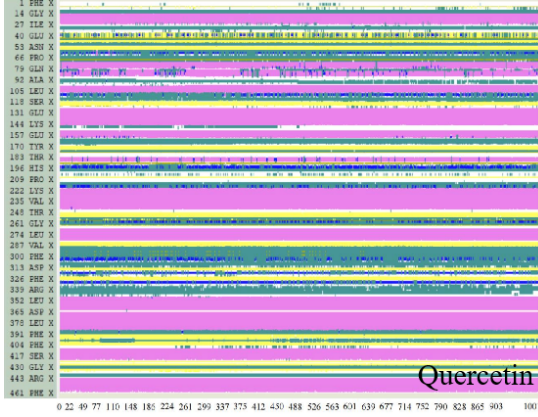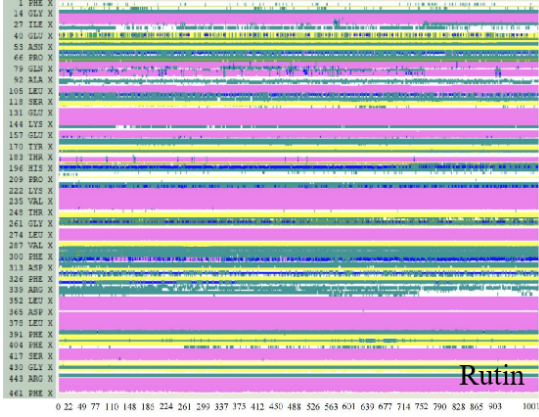



Supplement fig.5 Dictionary of Secondary Structures of Proteins (DSSP) analysis of 1OHW chain A interacting with several compounds for 10 ns molecular dynamics simulation.
